# Supplementary material for: Pressure-driven, solvation-directed planar chirality switching of cyclophano-pillar[5]arenes (molecular universal joints)
Source: Royal Society of Chemistry journal article supplement (doi:10.1039/d0sc06988d), 2021-01-01
Supplement: d0sc06988d1.pdf [file d0sc06988d1.pdf]

---

## Supporting Information

# Pressure-Driven, Solvation-Directed Planar Chirality Switching of Cyclophano-Pillar[5]arenes (Molecular Universal Joints)

Jiabin Yao,<sup>a</sup> Hiroaki Mizuno,<sup>b</sup> Chao Xiao,<sup>a</sup> Wanhua Wu,<sup>a</sup> Yoshihisa Inoue,<sup>\*c</sup> Cheng  
Yang,<sup>\*a</sup> and Gaku Fukuhara<sup>\*b,d</sup>

**Affiliations:** <sup>a</sup>Key Laboratory of Green Chemistry & Technology of Ministry of Education, College of Chemistry, State Key Laboratory of Biotherapy, and Healthy Food Evaluation Research Center, Sichuan University, Chengdu 610064, China

<sup>b</sup>Department of Chemistry, Tokyo Institute of Technology, 2-12-1 Ookayama, Meguro-ku, Tokyo 152-8551, Japan

<sup>c</sup>Department of Applied Chemistry, Osaka University, Suita 565-0871, Japan

<sup>d</sup>JST, PRESTO, 4-1-8 Honcho, Kawaguchi, Saitama 332-0012, Japan

**Corresponding Author:** yangchengyc@scu.edu.cn, inoue@chem.eng.osaka-u.ac.jp, gaku@chem.titech.ac.jp

### Table of Contents

|                                                                                                                                                    |    |
|----------------------------------------------------------------------------------------------------------------------------------------------------|----|
| Table of Contents .....                                                                                                                            | 1  |
| 1. Synthesis.....                                                                                                                                  | 2  |
| 2. Chiral HPLC Traces of Racemic and Optically Resolved MUJs.....                                                                                  | 3  |
| 3. Pressure-Dependent CD and UV-vis Spectra of <i>in</i> -( <i>R<sub>p</sub></i> )/ <i>out</i> -( <i>S<sub>p</sub></i> ) -MUJs .....               | 4  |
| 4. Pressure Effects on the Anisotropy ( <i>g</i> ) Factors of <i>in</i> -( <i>R<sub>p</sub></i> )/ <i>out</i> -( <i>S<sub>p</sub></i> )-MUJs ..... | 21 |
| 5. DFT Calculations of the van der Waals Volumes of the <i>in</i> - and <i>out</i> -Conformers of MUJs .....                                       | 21 |
| 6. Complexation of Solvent Molecules with 1,4-Diethoxypillar[5]arene (DEP[5]) in Methylcyclohexane .....                                           | 22 |
| 7. Anisotropy Factors of Pure <i>out</i> -MUJs.....                                                                                                | 24 |
| 8. <sup>1</sup> H NMR Spectral Titration of DEP[5] in MCH- <i>d</i> <sub>14</sub> .....                                                            | 25 |
| 9. Appendix .....                                                                                                                                  | 30 |
| References .....                                                                                                                                   | 37 |

## 1. Synthesis

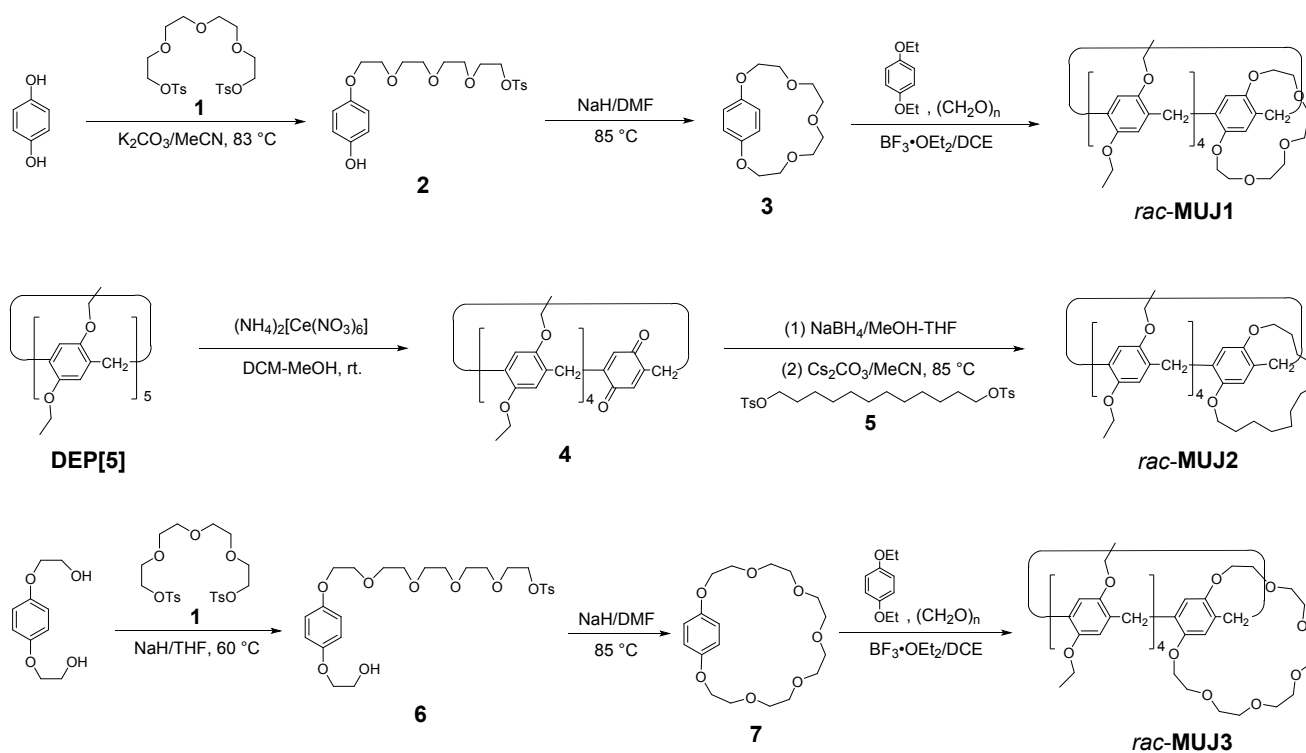

**Scheme S1** Syntheses of **MUJ1**, **MUJ2**, and **MUJ3**.

## 2. Chiral HPLC Traces of Racemic and Optically Resolved MUJs

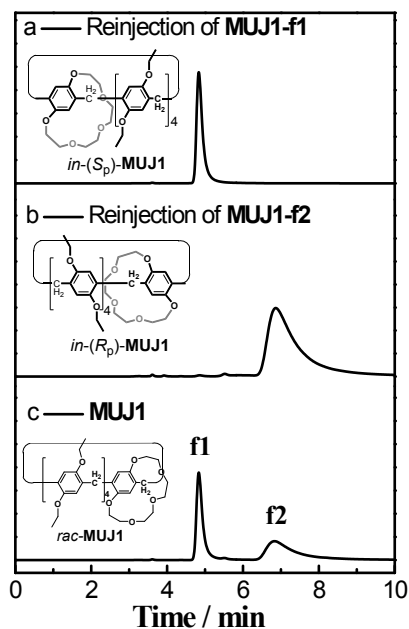

**Fig. S1** Chiral HPLC chromatograms ( $n$ -H:THF = 9:1) for (a)  $in$ -( $S_p$ )-MUJ1 (the first fraction), (b)  $in$ -( $R_p$ )-MUJ1 (the second fraction), and (c)  $rac$ -MUJ1 as prepared.

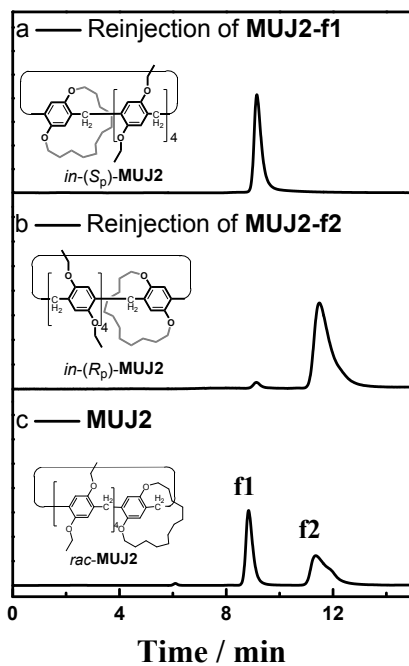

**Fig. S2** Chiral HPLC chromatograms ( $n$ -H:DCM = 9:1) for (a)  $in$ -( $S_p$ )-MUJ2 (the first fraction), (b)  $in$ -( $R_p$ )-MUJ2 (the second fraction), and (c)  $rac$ -MUJ2.

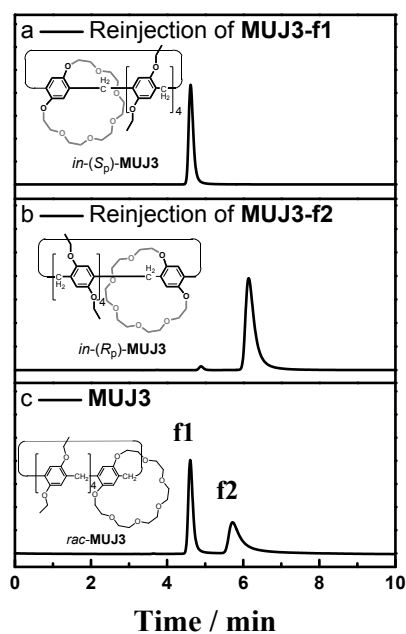

**Fig. S3** Chiral HPLC chromatograms ( $n$ -H:THF = 9:1) for (a)  $in$ -( $S_p$ )-MUJ3 (the first fraction), (b)  $in$ -( $R_p$ )-MUJ3 (the second fraction), and (c)  $rac$ -MUJ3.

### 3. Pressure-Dependent CD and UV-vis Spectra of *in*-( $R_p$ )/*out*-( $S_p$ )-MUJs

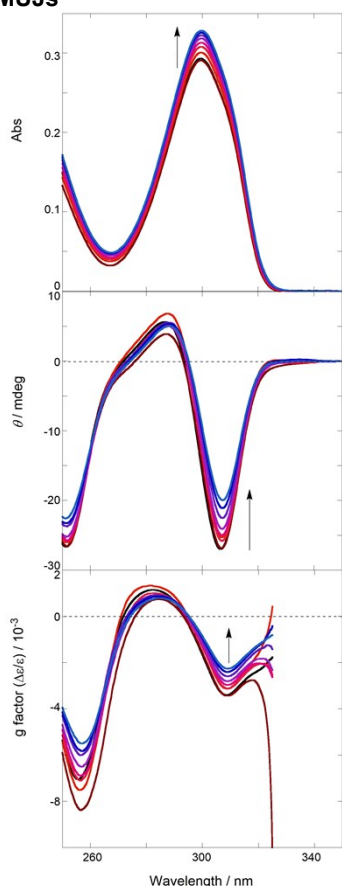

**Fig. S4** UV/vis (top), CD (middle), and anisotropy (bottom) spectra of *in*-( $R_p$ )/*out*-( $S_p$ )-MUJ1 (104 μM) at 0.1, 40, 80, 120, 160, 200, 240, 280, and 320 MPa (from black to light blue) in AN at room temperature, measured in a high-pressure cell.

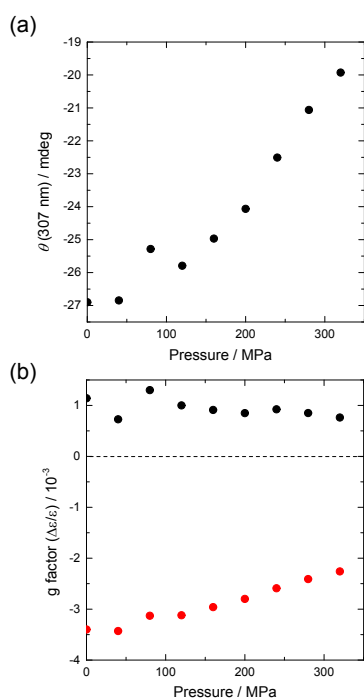

**Fig. S5** Plots of (a) ellipticity changes at 307 nm and (b) anisotropy changes at 283 (black) and 309 nm (red) for *in*-( $R_p$ )/*out*-( $S_p$ )-MUJ1 in AN as a function of pressure.

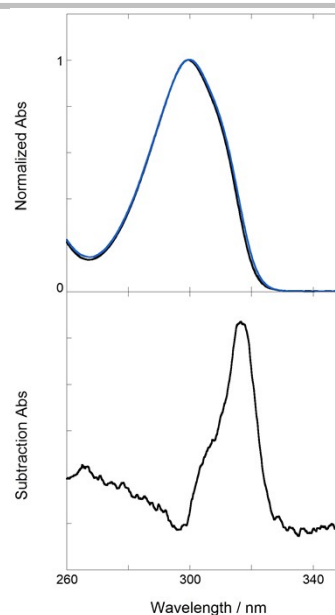

**Fig. S6** Normalized UV/vis (normalized at 299 nm; top) and subtraction UV (bottom) spectra of *in*-( $R_p$ )/*out*-( $S_p$ )-MUJ1 (104 μM) at 0.1 (black) and 320 MPa (light blue) in AN at room temperature, measured in a high-pressure cell.

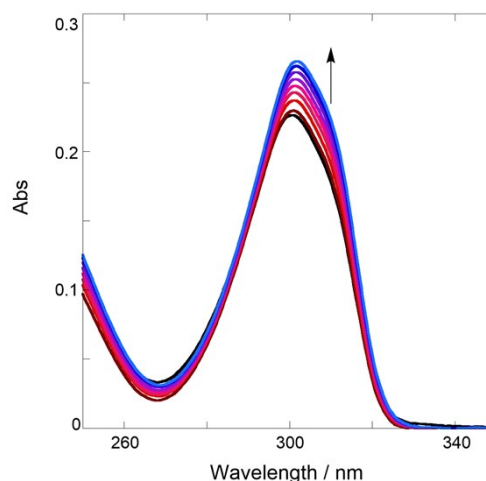

**Fig. S7** UV/vis (top) spectra of *in*-( $R_p$ )/*out*-( $S_p$ )-MUJ2 (92 μM) at 0.1, 40, 80, 120, 160, 200, 240, 280, and 320 MPa (from black to light blue) in AN at room temperature, measured in a high-pressure cell.

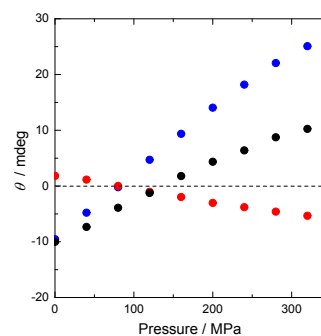

**Fig. S8** Plots of ellipticity changes at 309 (blue), 290 (red), and 254 nm (black) for *in*-( $R_p$ )/*out*-( $S_p$ )-MUJ2 in AN as a function of pressure.

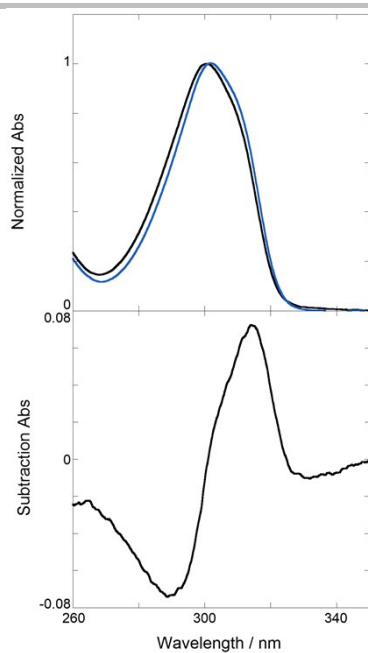

**Fig. S9** Normalized UV/vis (normalized at 301 nm; top) and subtraction UV (bottom) spectra of *in*-( $R_p$ )/*out*-( $S_p$ )-**MUJ2** (92  $\mu$ M) at 0.1 (black) and 320 MPa (light blue) in AN at room temperature, measured in a high-pressure cell.

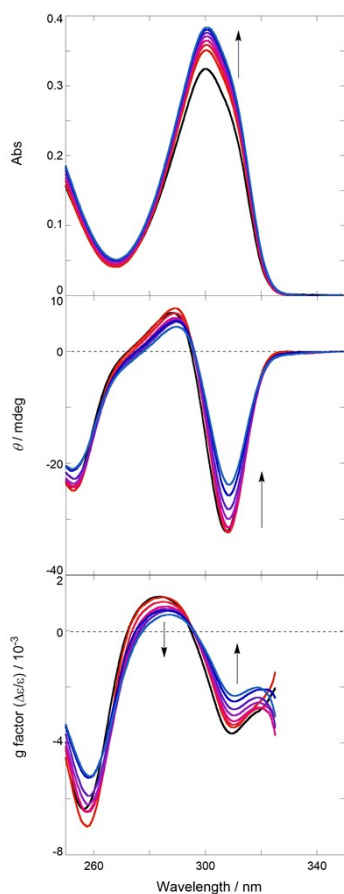

**Fig. S10** UV/vis (top), CD (middle), and anisotropy (bottom) spectra of *in*-( $R_p$ )/*out*-( $S_p$ )-**MUJ3** (98  $\mu$ M) at 0.1, 80, 120, 160, 200, 240, 280, and 320 MPa (from black to light blue) in AN at room temperature, measured in a high-pressure cell.

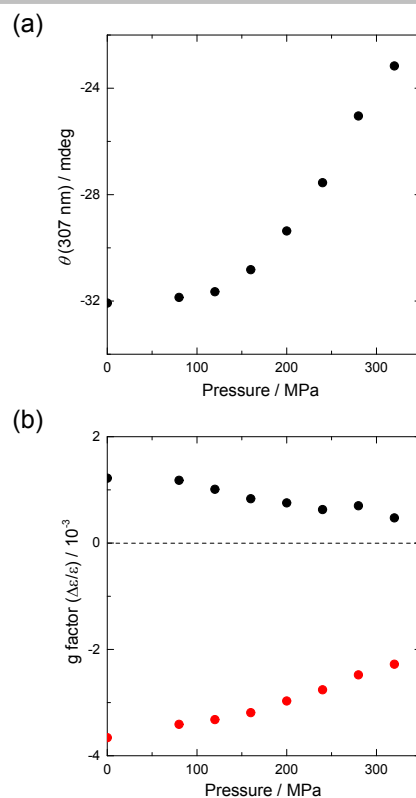

**Fig. S11** Plots of (a) ellipticity changes at 307 nm and (b) anisotropy changes at 283 (black) and 309 nm (red) for *in*-( $R_p$ )/*out*-( $S_p$ )-**MUJ3** in AN as a function of pressure.

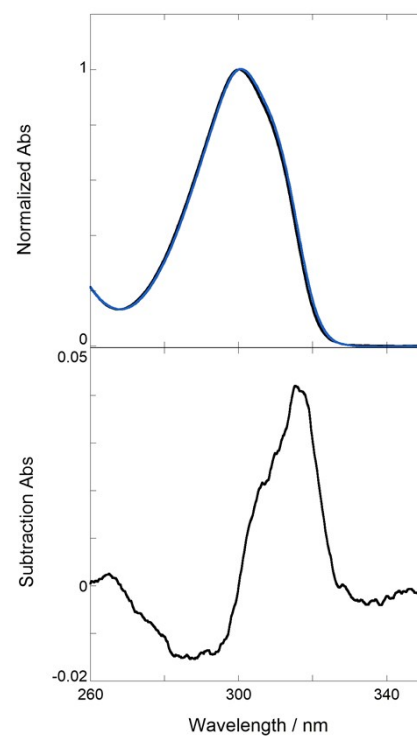

**Fig. S12** Normalized UV/vis (normalized at 300 nm; top) and subtraction UV (bottom) spectra of *in*-( $R_p$ )/*out*-( $S_p$ )-**MUJ3** (98  $\mu$ M) at 0.1 (black) and 320 MPa (light blue) in AN at room temperature, measured in a high-pressure cell.

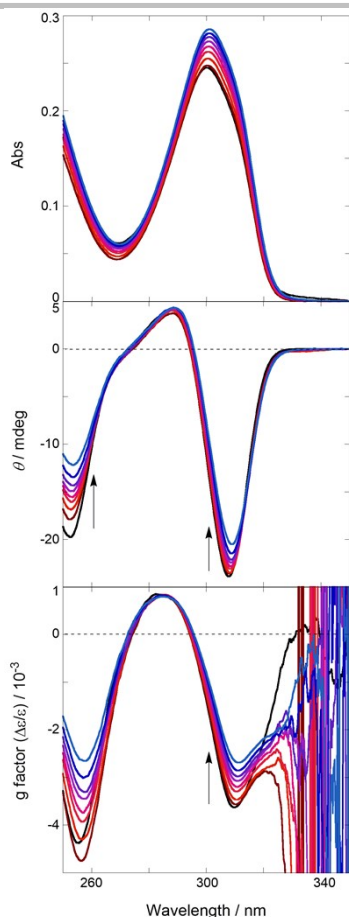

**Fig. S13** UV/vis (top), CD (middle), and anisotropy (bottom) spectra of *in*-( $R_p$ )/*out*-( $S_p$ )-**MUJ1** (84  $\mu$ M) at 0.1, 40, 80, 120, 160, 200, 240, 280, and 320 MPa (from black to light blue) in DCM at room temperature, measured in a high-pressure cell.

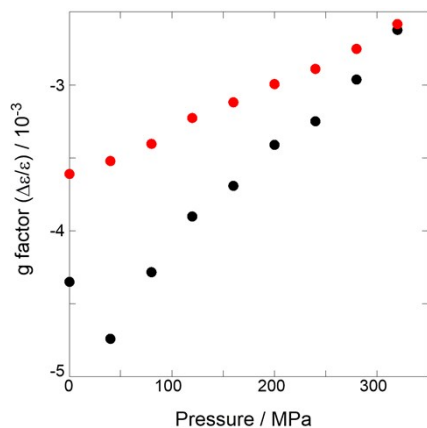

**Fig. S14** Plots of anisotropy changes at 256 (black) and 309 nm (red) for *in*-( $R_p$ )/*out*-( $S_p$ )-**MUJ1** in DCM as a function of pressure.

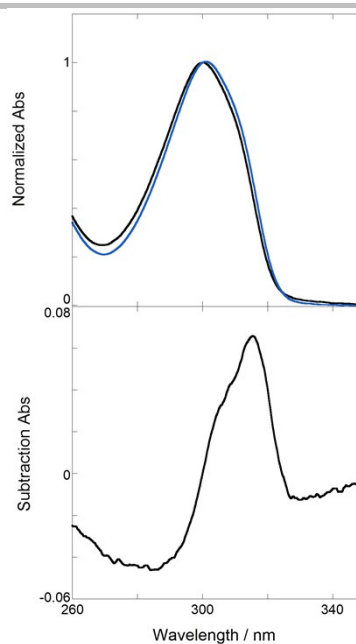

**Fig. S15** Normalized UV/vis (normalized at 300 nm; top) and subtraction UV (bottom) spectra of *in*-( $R_p$ )/*out*-( $S_p$ )-**MUJ1** (84  $\mu$ M) at 0.1 (black) and 320 MPa (light blue) in DCM at room temperature, measured in a high-pressure cell.

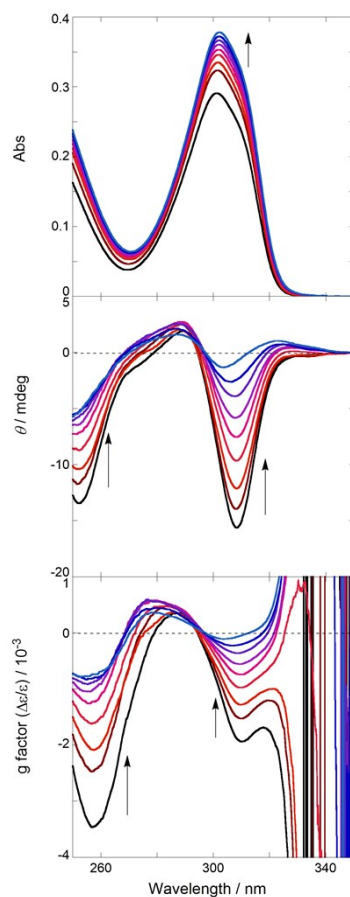

**Fig. S16** UV/vis (top), CD (middle), and anisotropy (bottom) spectra of *in*-( $R_p$ )/*out*-( $S_p$ )-**MUJ2** (90  $\mu$ M) at 0.1, 40, 80, 120, 160, 200, 240, 280, and 320 MPa (from black to light blue) in DCM at room temperature, measured in a high-pressure cell.

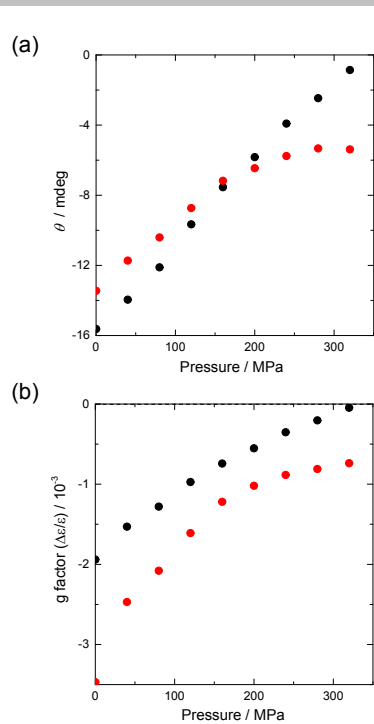

**Fig. S17** Plots of (a) ellipticity changes at 308 (black) and 252 nm (red) and (b) anisotropy changes at 310 (black) and 257 nm (red) for *in*-( $R_p$ )/*out*-( $S_p$ )-MUJ2 in DCM as a function of pressure.

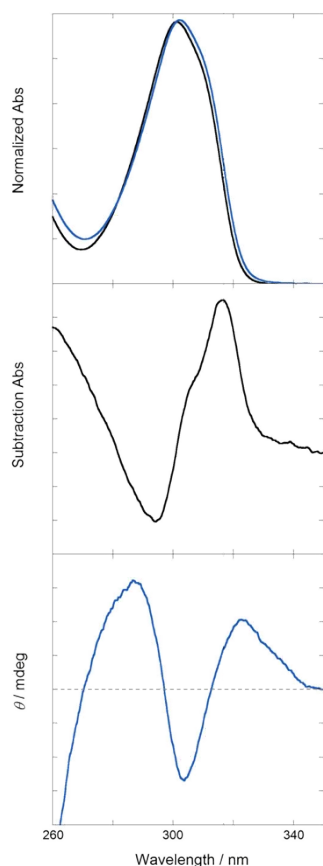

**Fig. S18** Normalized UV/vis (top), subtraction UV (middle), and CD spectra of *in*-( $R_p$ )/*out*-( $S_p$ )-MUJ2 (90  $\mu$ M) at 0.1 (black) and 320 MPa (light blue) in DCM at room temperature, measured in a high-pressure cell.

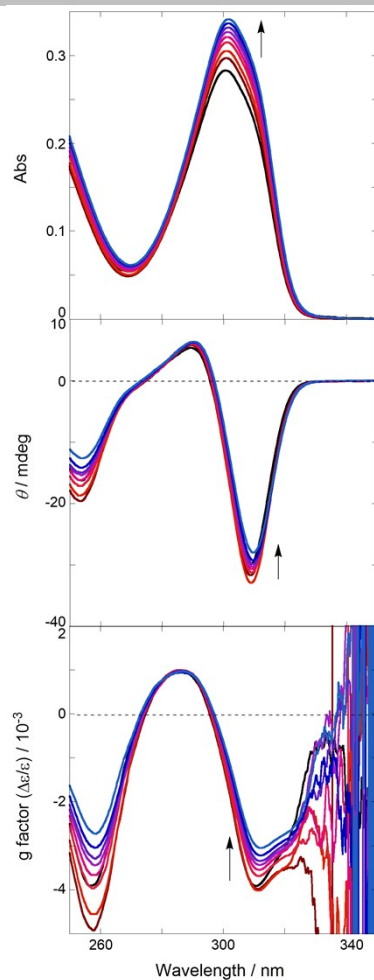

**Fig. S19** UV/vis (top), CD (middle), and anisotropy (bottom) spectra of *in*-( $R_p$ )/*out*-( $S_p$ )-MUJ3 (89  $\mu$ M) at 0.1, 40, 80, 120, 160, 200, 240, 280, and 320 MPa (from black to light blue) in DCM at room temperature, measured in a high-pressure cell.

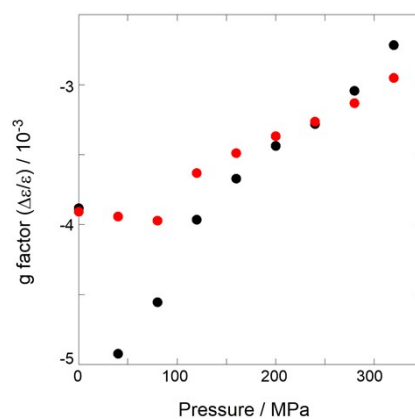

**Fig. S20** Plots of anisotropy changes at 258 (black) and 310 nm (red) for *in*-( $R_p$ )/*out*-( $S_p$ )-MUJ3 in DCM as a function of pressure.

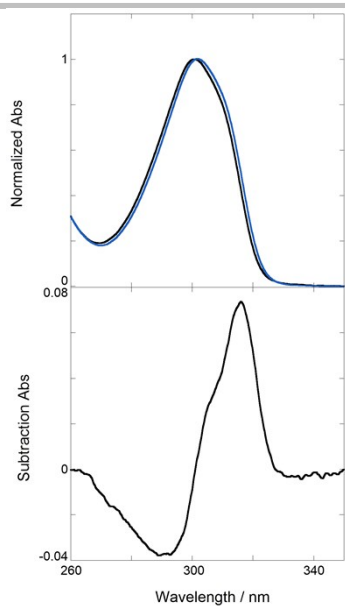

**Fig. S21** Normalized UV/vis (normalized at 301 nm; top) and subtraction UV (bottom) spectra of *in-(R<sub>p</sub>)/out-(S<sub>p</sub>)-MUJ3* (89  $\mu$ M) at 0.1 (black) and 320 MPa (light blue) in DCM at room temperature, measured in a high-pressure cell.

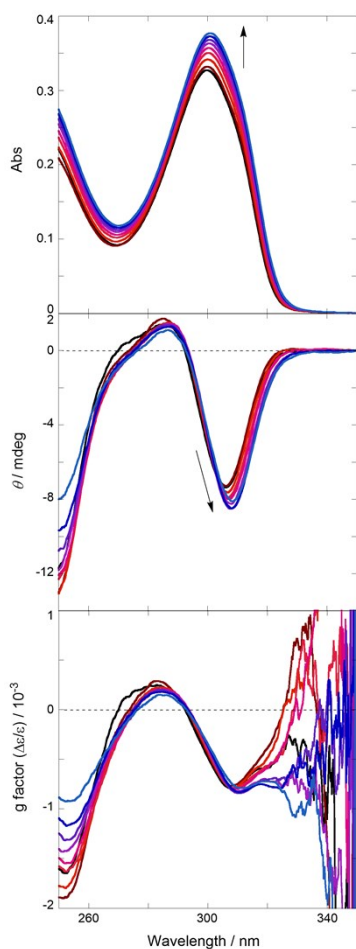

**Fig. S22** UV/vis (top), CD (middle), and anisotropy (bottom) spectra of *in-(R<sub>p</sub>)/out-(S<sub>p</sub>)-MUJ1* (111  $\mu$ M) at 0.1, 40, 80, 120, 160, 200, 240, 280, and 320 MPa (from black to light blue) in CHL at room temperature, measured in a high-pressure cell.

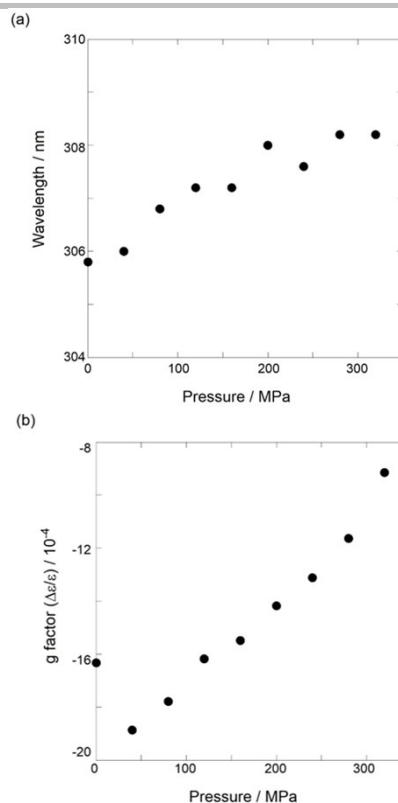

**Fig. S23** Plots of (a) ellipticity maxima and (b) anisotropy changes at 253 nm for *in-(R<sub>p</sub>)/out-(S<sub>p</sub>)-MUJ1* in CHL as a function of pressure.

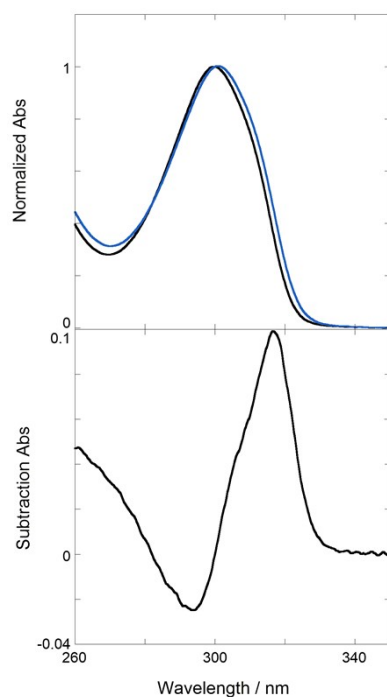

**Fig. S24** Normalized UV/vis (normalized at 300 nm; top) and subtraction UV (bottom) spectra of *in-(R<sub>p</sub>)/out-(S<sub>p</sub>)-MUJ1* (111  $\mu$ M) at 0.1 (black) and 320 MPa (light blue) in CHL at room temperature, measured in a high-pressure cell.



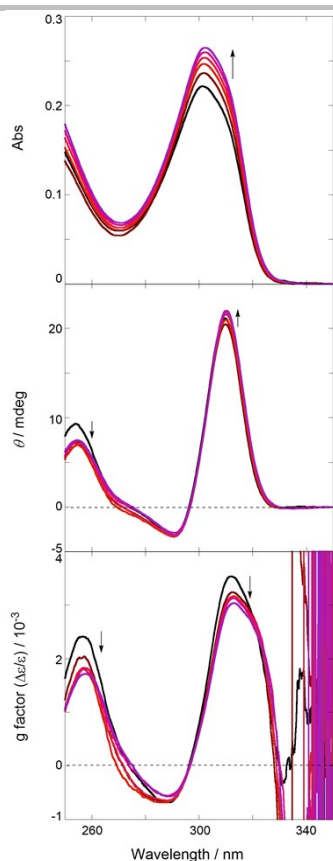

**Fig. S25** UV/vis (top), CD (middle), and anisotropy (bottom) spectra of *in*-( $R_p$ )/*out*-( $S_p$ )-**MUJ2** (83  $\mu$ M) at 0.1, 40, 80, 120, 160, and 200 MPa (from black to purple) in CHL at room temperature, measured in a high-pressure cell.

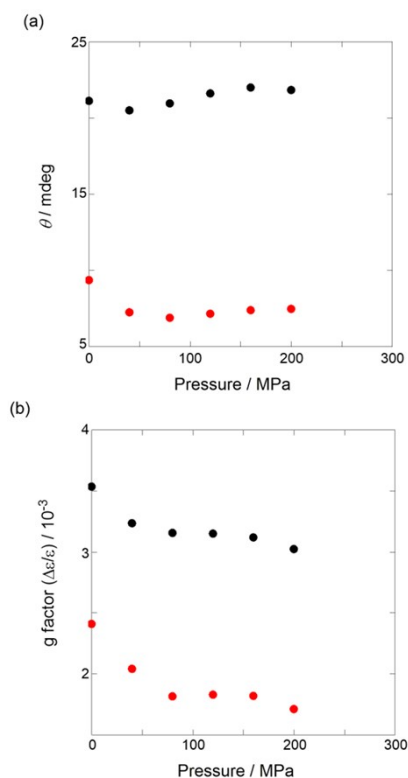

**Fig. S26** Plots of (a) ellipticity changes at 310 (black) and 254 nm (red) and (b) anisotropy changes at 312 (black) and 257 nm (red) for *in*-( $R_p$ )/*out*-( $S_p$ )-**MUJ2** in CHL as a function of pressure.

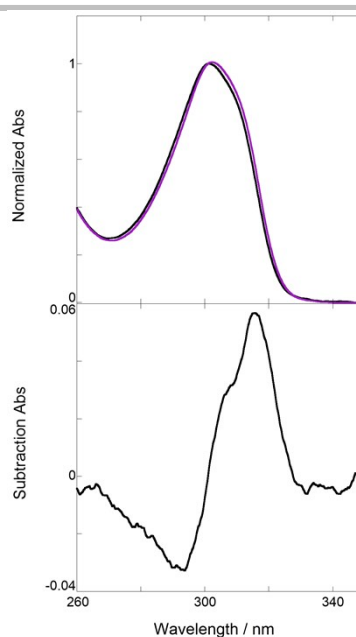

**Fig. S27** Normalized UV/vis (normalized at 301 nm; top) and subtraction UV (bottom) spectra of *in*-( $R_p$ )/*out*-( $S_p$ )-**MUJ2** (83  $\mu$ M) at 0.1 (black) and 200 MPa (purple) in CHL at room temperature, measured in a high-pressure cell.

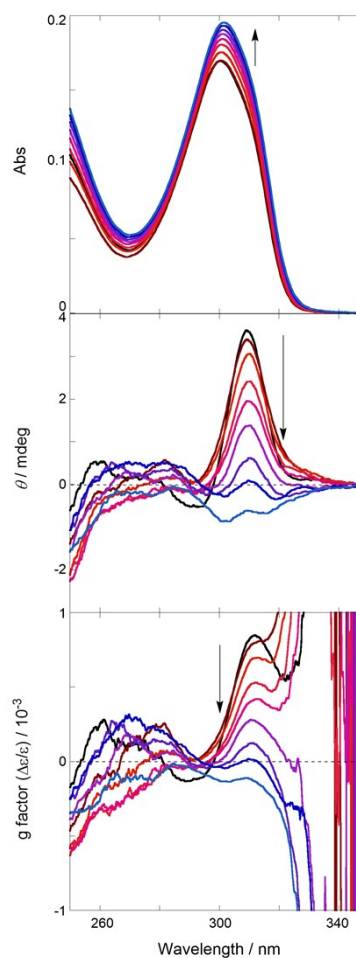

**Fig. S28** UV/vis (top), CD (middle), and anisotropy (bottom) spectra of *in*-( $R_p$ )/*out*-( $S_p$ )-**MUJ3** (71  $\mu$ M) at 0.1, 40, 80, 120, 160, 200, 240, 280, and 320 MPa (from black to light blue) in CHL at room temperature, measured in a high-pressure cell.

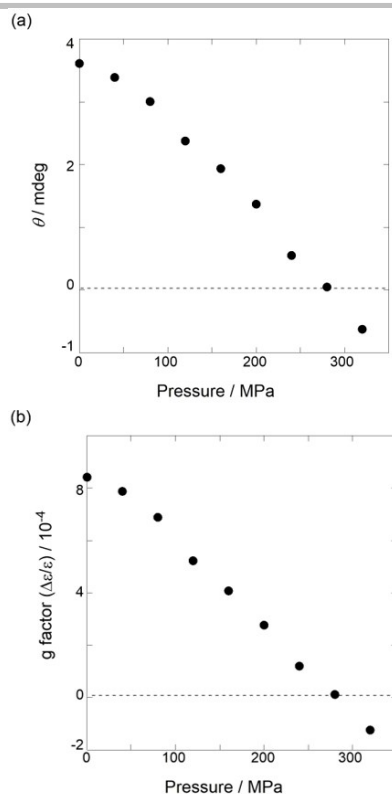

**Fig. S29** Plots of (a) ellipticity changes at 309 nm and (b) anisotropy changes at 311 nm for *in*-( $R_p$ )/*out*-( $S_p$ )-**MUJ3** in CHL as a function of pressure.

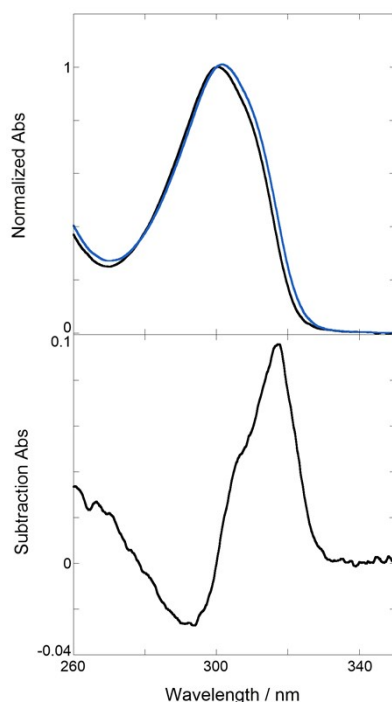

**Fig. S30** Normalized UV/vis (normalized at 300 nm; top) and subtraction UV (bottom) spectra of *in*-( $R_p$ )/*out*-( $S_p$ )-**MUJ3** (71  $\mu$ M) at 0.1 (black) and 320 MPa (light blue) in CHL at room temperature, measured in a high-pressure cell.

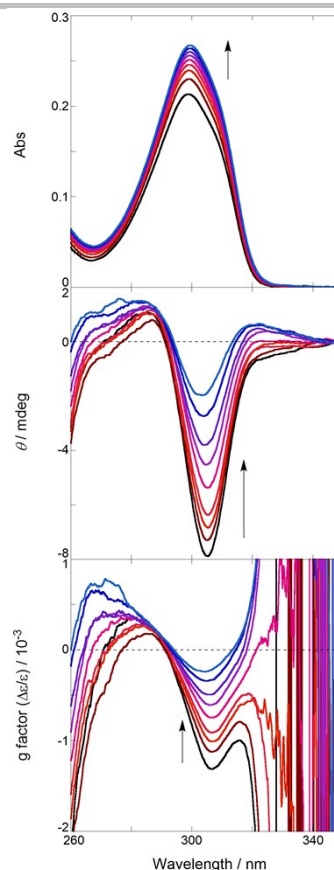

**Fig. S31** UV/vis (top), CD (middle), and anisotropy (bottom) spectra of *in*-( $R_p$ )/*out*-( $S_p$ )-**MUJ1** (94  $\mu$ M) at 0.1, 40, 80, 120, 160, 200, 240, 280, and 320 MPa (from black to light blue) in EA at room temperature, measured in a high-pressure cell.

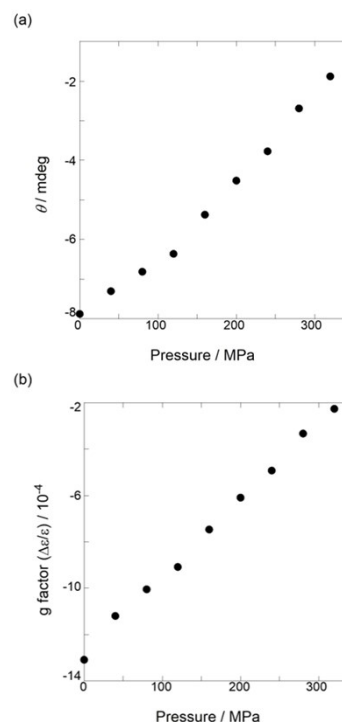

**Fig. S32** Plots of (a) ellipticity changes at 305 nm (black) and (b) anisotropy changes at 306 nm (black) for *in*-( $R_p$ )/*out*-( $S_p$ )-**MUJ1** in EA as a function of pressure.

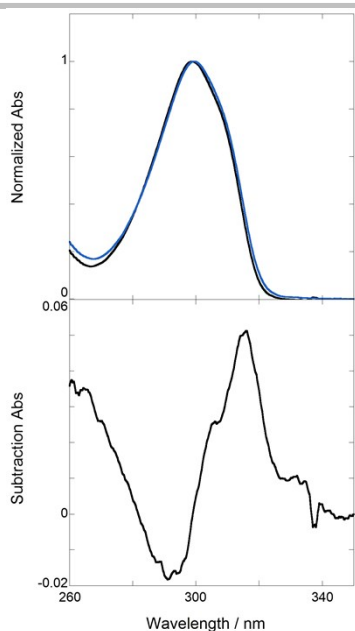

**Fig. S33** Normalized UV/vis (normalized at 299 nm; top) and subtraction UV (bottom) spectra of *in*-( $R_p$ )/*out*-( $S_p$ )-**MUJ1** (94  $\mu$ M) at 0.1 (black) and 320 MPa (light blue) in EA at room temperature, measured in a high-pressure cell.

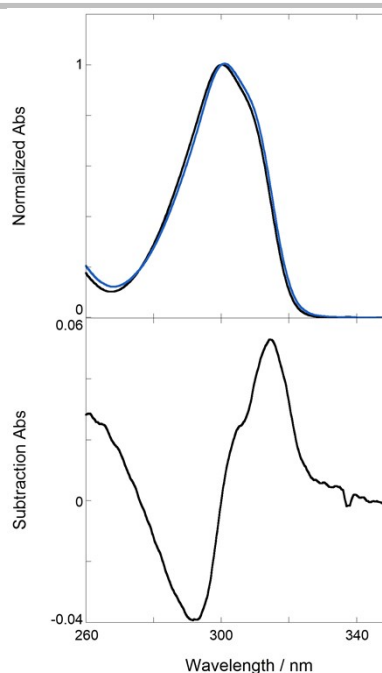

**Fig. S36** Normalized UV/vis (normalized at 300 nm; top) and subtraction UV (bottom) spectra of *in*-( $R_p$ )/*out*-( $S_p$ )-**MUJ2** (136  $\mu$ M) at 0.1 (black) and 320 MPa (light blue) in EA at room temperature, measured in a high-pressure cell.

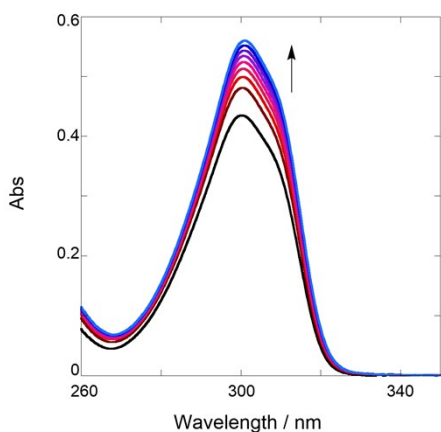

**Fig. S34** UV/vis spectra of *in*-( $R_p$ )/*out*-( $S_p$ )-**MUJ2** (136  $\mu$ M) at 0.1, 40, 80, 120, 160, 200, 240, 280, and 320 MPa (from black to light blue) in EA at room temperature, measured in a high-pressure cell.

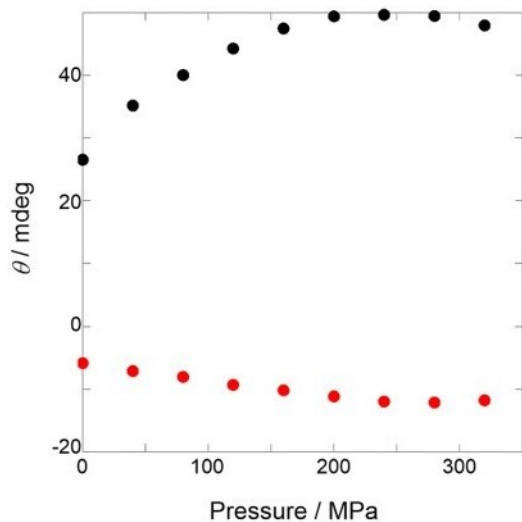

**Fig. S35** Plots of ellipticity changes at 308 (black) and 290 nm (red) for *in*-( $R_p$ )/*out*-( $S_p$ )-**MUJ2** in EA as a function of pressure.

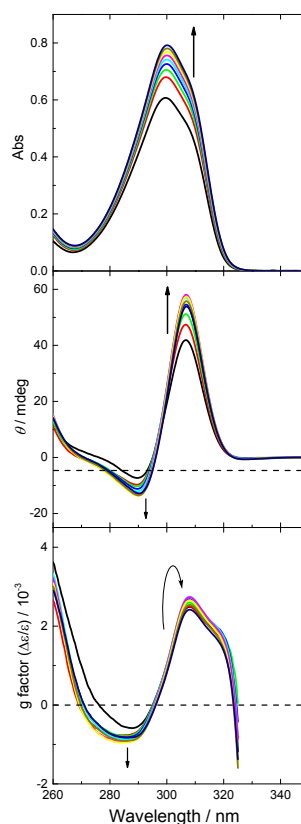

**Fig. S37** UV/vis (top), CD (middle), and anisotropy (bottom) spectra of *in*-( $R_p$ )/*out*-( $S_p$ )-**MUJ3** (179  $\mu$ M) at 0.1, 40, 80, 120, 160, 200, 240, 280, and 320 MPa (from black to light blue) in EA at room temperature, measured in a high-pressure cell.

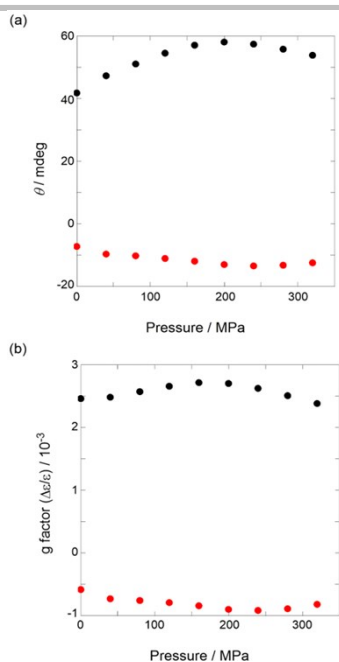

**Fig. S38** Plots of (a) ellipticity changes at 307 (black) and 289 nm (red) and (b) anisotropy changes at 307 (black) and 288 nm (red) for *in*-( $R_p$ )/*out*-( $S_p$ )-MUJ3 in EA as a function of pressure.

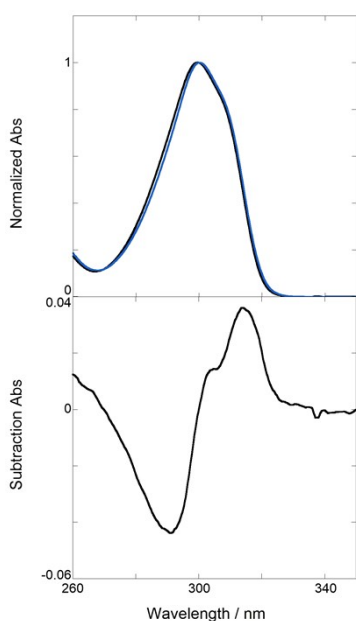

**Fig. S39** Normalized UV/vis (normalized at 300 nm; top) and subtraction UV (bottom) spectra of *in*-( $R_p$ )/*out*-( $S_p$ )-MUJ3 (179  $\mu$ M) at 0.1 (black) and 320 MPa (light blue) in EA at room temperature, measured in a high-pressure cell.

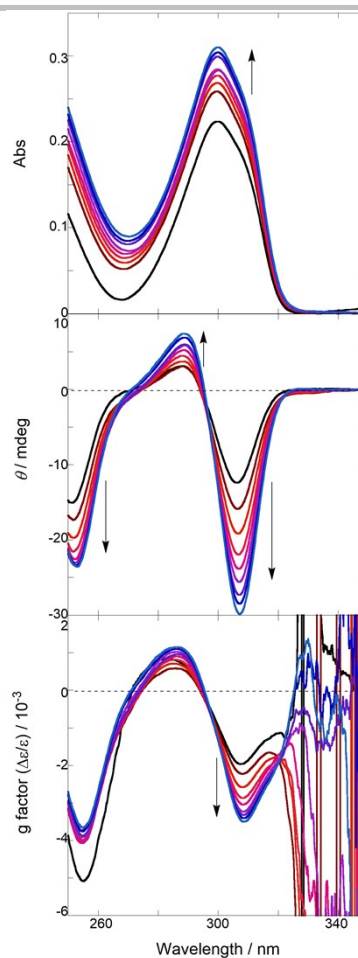

**Fig. S40** UV/vis (top), CD (middle), and anisotropy (bottom) spectra of *in*-( $R_p$ )/*out*-( $S_p$ )-MUJ1 (97  $\mu$ M) at 0.1, 40, 80, 120, 160, 200, 240, 280, and 320 MPa (from black to light blue) in THF at room temperature, measured in a high-pressure cell.

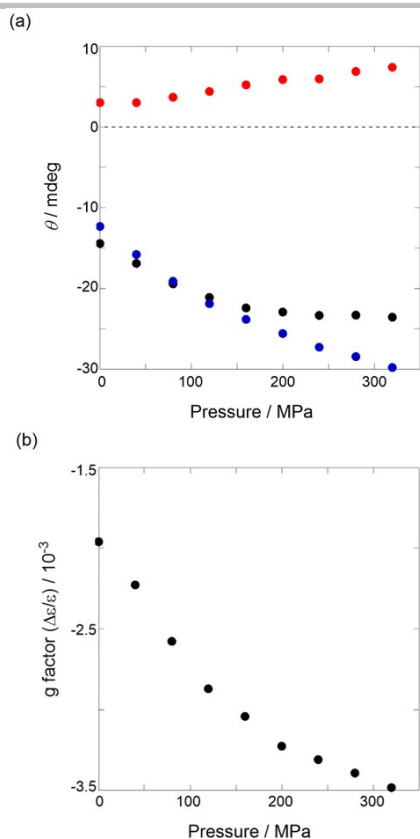

**Fig. S41** Plots of (a) ellipticity changes at 307 (blue), 289 (red), and 253 nm (black) and (b) anisotropy changes at 308 nm for *in*-( $R_p$ )/*out*-( $S_p$ )-**MUJ1** in THF as a function of pressure.

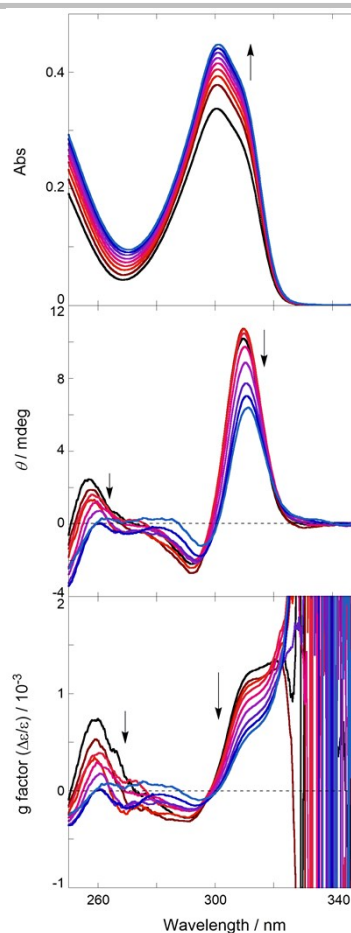

**Fig. S43** UV/vis (top), CD (middle), and anisotropy (bottom) spectra of *in*-( $R_p$ )/*out*-( $S_p$ )-**MUJ2** (93  $\mu$ M) at 0.1, 40, 80, 120, 160, 200, 240, 280, and 320 MPa (from black to light blue) in THF at room temperature, measured in a high-pressure cell.

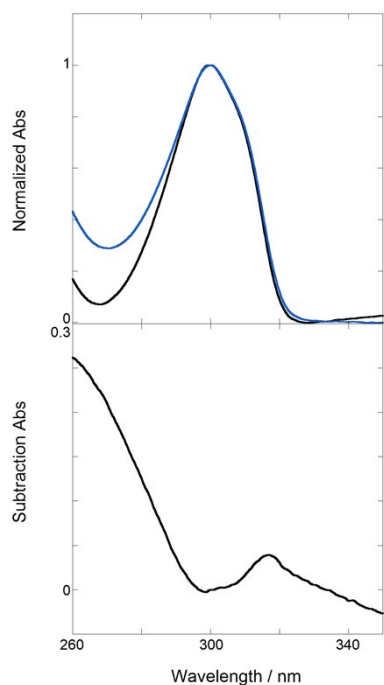

**Fig. S42** Normalized UV/vis (normalized at 301 nm; top) and subtraction UV (bottom) spectra of *in*-( $R_p$ )/*out*-( $S_p$ )-**MUJ1** (97  $\mu$ M) at 0.1 (black) and 320 MPa (light blue) in THF at room temperature, measured in a high-pressure cell.

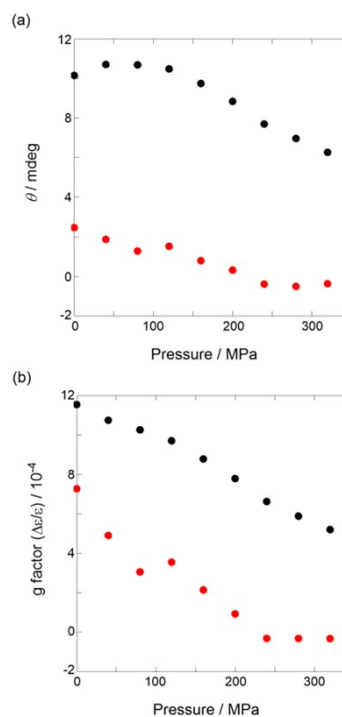

**Fig. S44** Plots of (a) ellipticity changes at 310 (black) and 257 nm (red) and (b) anisotropy changes at 310 (black) and 258 nm (red) for *in*-( $R_p$ )/*out*-( $S_p$ )-**MUJ2** in THF as a function of pressure.

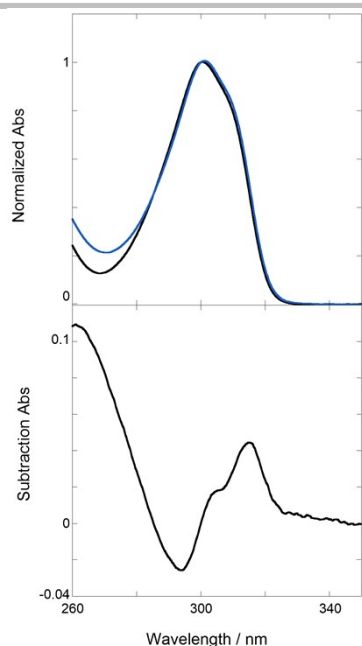

**Fig. S45** Normalized UV/vis (normalized at 300 nm; top) and subtraction UV (bottom) spectra of *in*-( $R_p$ )/*out*-( $S_p$ )-**MUJ2** (93  $\mu$ M) at 0.1 (black) and 320 MPa (light blue) in THF at room temperature, measured in a high-pressure cell.

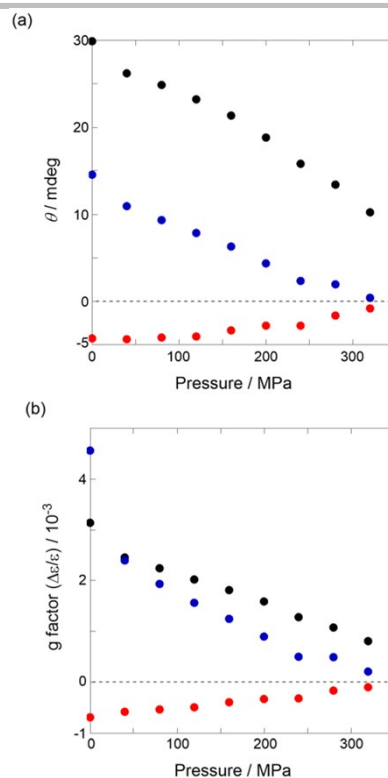

**Fig. S47** Plots of (a) ellipticity changes at 307 (black), 290 (red), and 254 nm (blue) and (b) anisotropy changes at 308 (black), 287 (red), and 257 nm (blue) for *in*-( $R_p$ )/*out*-( $S_p$ )-**MUJ3** in THF as a function of pressure.

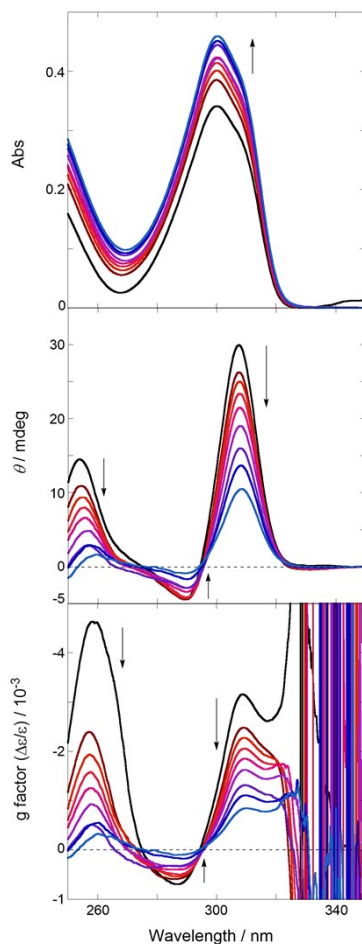

**Fig. S46** UV/vis (top), CD (middle), and anisotropy (bottom) spectra of *in*-( $R_p$ )/*out*-( $S_p$ )-**MUJ3** (60  $\mu$ M) at 0.1, 40, 80, 120, 160, 200, 240, 280, and 320 MPa (from black to light blue) in THF at room temperature, measured in a high-pressure cell.

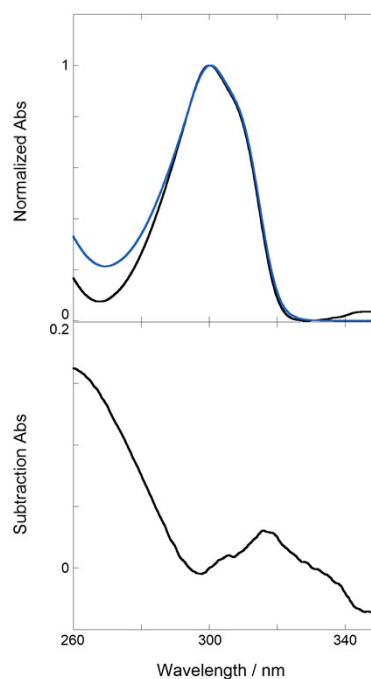

**Fig. S48** Normalized UV/vis (normalized at 301 nm; top) and subtraction UV (bottom) spectra of *in*-( $R_p$ )/*out*-( $S_p$ )-**MUJ3** (60  $\mu$ M) at 0.1 (black) and 320 MPa (light blue) in THF at room temperature, measured in a high-pressure cell.



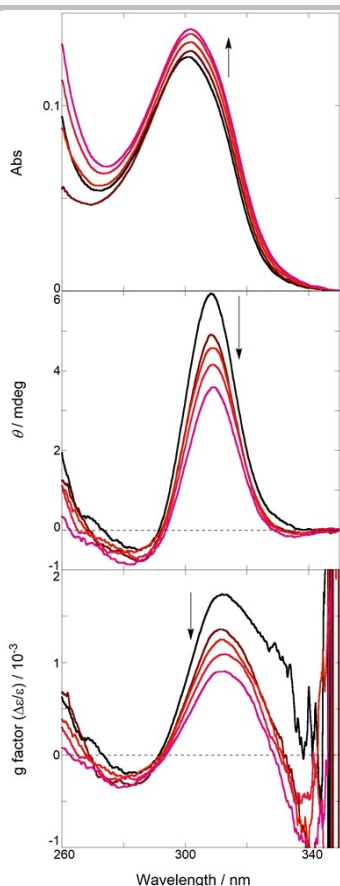

**Fig. S49** UV/vis (top), CD (middle), and anisotropy (bottom) spectra of *in*-( $R_p$ )/*out*-( $S_p$ )-**MUJ1** (91  $\mu$ M) at 0.1, 40, 80, 120, and 160 MPa (from black to pink) in CTC at room temperature, measured in a high-pressure cell.

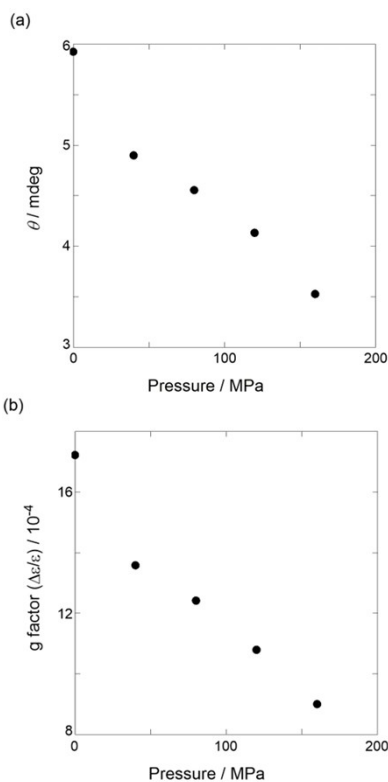

**Fig. S50** Plots of (a) ellipticity changes at 308 nm (black) and (b) anisotropy changes at 311 nm (black) for *in*-( $R_p$ )/*out*-( $S_p$ )-**MUJ1** in CTC as a function of pressure.

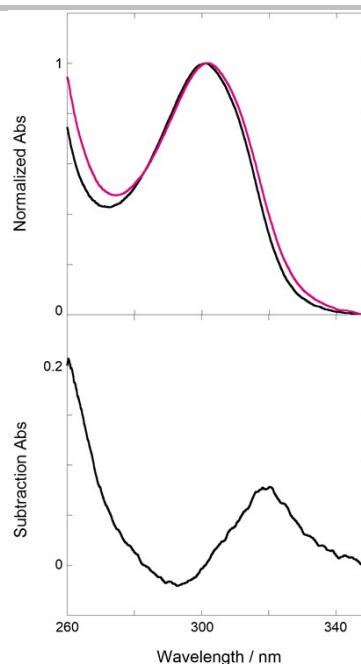

**Fig. S51** Normalized UV/vis (normalized at 301 nm; top) and subtraction UV (bottom) spectra of *in*-( $R_p$ )/*out*-( $S_p$ )-**MUJ1** (91  $\mu$ M) at 0.1 (black) and 160 MPa (pink) in CTC at room temperature, measured in a high-pressure cell.

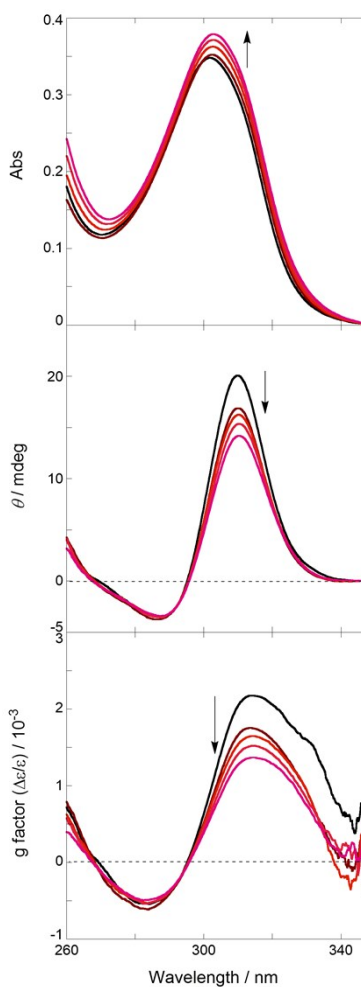

**Fig. S52** UV/vis (top), CD (middle), and anisotropy (bottom) spectra of *in*-( $R_p$ )/*out*-( $S_p$ )-**MUJ2** (120  $\mu$ M) at 0.1, 40, 80, 120, and 160 MPa (from black to pink) in CTC at room temperature, measured in a high-pressure cell.

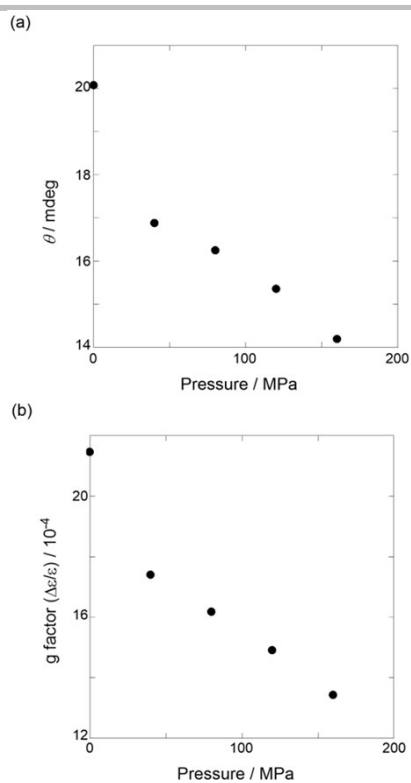

**Fig. S53** Plots of (a) ellipticity changes at 310 nm (black) and (b) anisotropy changes at 312 nm (black) for *in*-(*R<sub>p</sub>*)/*out*-(*S<sub>p</sub>*)-MUJ2 in CTC as a function of pressure.

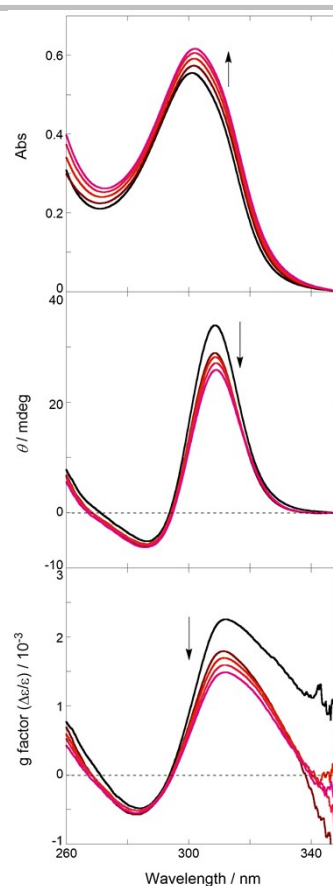

**Fig. S55** UV/vis (top), CD (middle), and anisotropy (bottom) spectra of *in*-(*R<sub>p</sub>*)/*out*-(*S<sub>p</sub>*)-MUJ3 (166  $\mu$ M) at 0.1, 40, 80, 120, and 160 MPa (from black to pink) in CTC at room temperature, measured in a high-pressure cell.

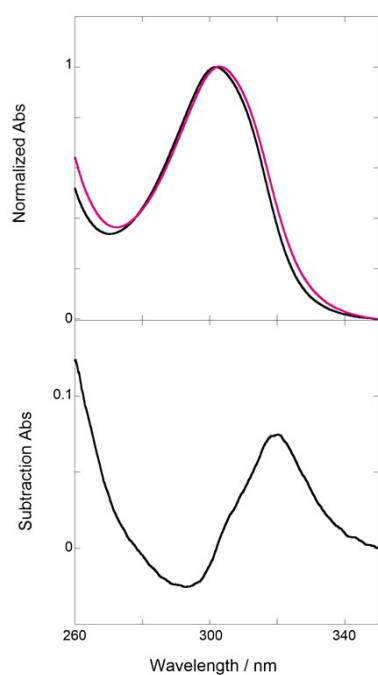

**Fig. S54** Normalized UV/vis (normalized at 302 nm; top) and subtraction UV (bottom) spectra of *in*-(*R<sub>p</sub>*)/*out*-(*S<sub>p</sub>*)-MUJ2 (120  $\mu$ M) at 0.1 (black) and 160 MPa (pink) in CTC at room temperature, measured in a high-pressure cell.

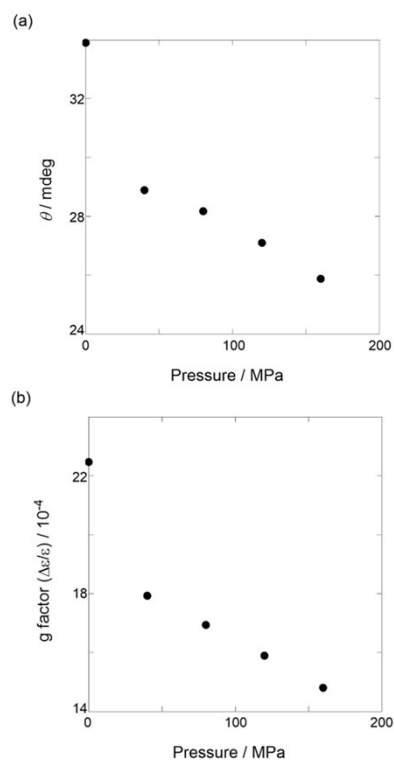

**Fig. S56** Plots of (a) ellipticity changes at 309 nm (black) and (b) anisotropy changes at 311 nm (black) for *in*-(*R<sub>p</sub>*)/*out*-(*S<sub>p</sub>*)-MUJ3 in CTC as a function of pressure.



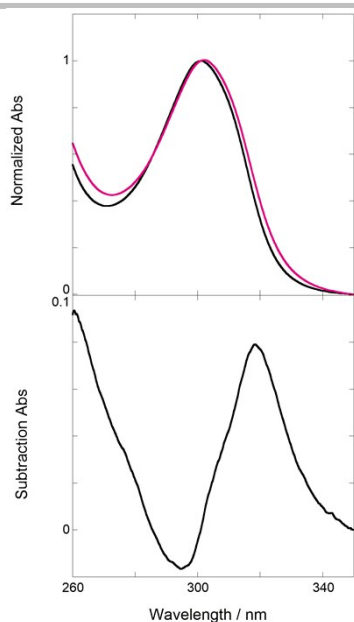

**Fig. S57** Normalized UV/vis (normalized at 301 nm; top) and subtraction UV (bottom) spectra of *in-(R<sub>p</sub>)/out-(S<sub>p</sub>)-MUJ3* (166  $\mu$ M) at 0.1 (black) and 160 MPa (pink) in CTC at room temperature, measured in a high-pressure cell.

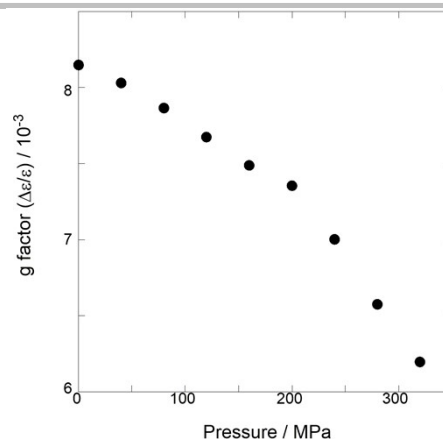

**Fig. S59** Plots of anisotropy changes at 257 nm for *in-(R<sub>p</sub>)/out-(S<sub>p</sub>)-MUJ1* in MCH as a function of pressure.

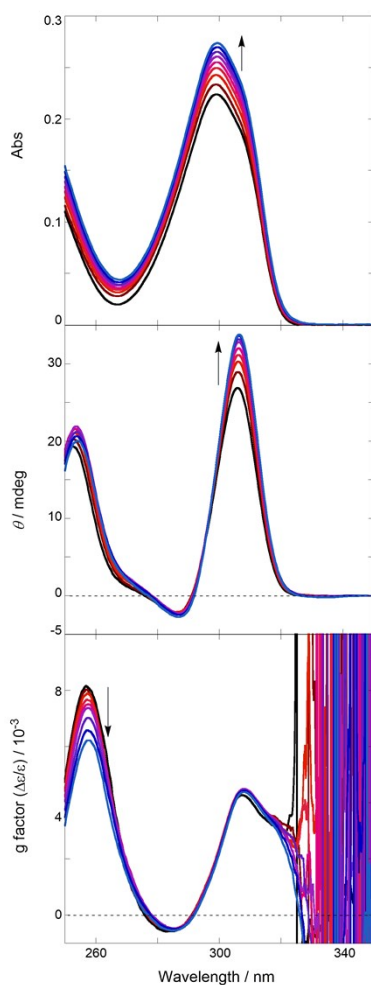

**Fig. S58** UV/vis (top), CD (middle), and anisotropy (bottom) spectra of *in-(R<sub>p</sub>)/out-(S<sub>p</sub>)-MUJ1* (91  $\mu$ M) at 0.1, 40, 80, 120, 160, 200, 240, 280, and 320 MPa (from black to light blue) in MCH at room temperature, measured in a high-pressure cell.

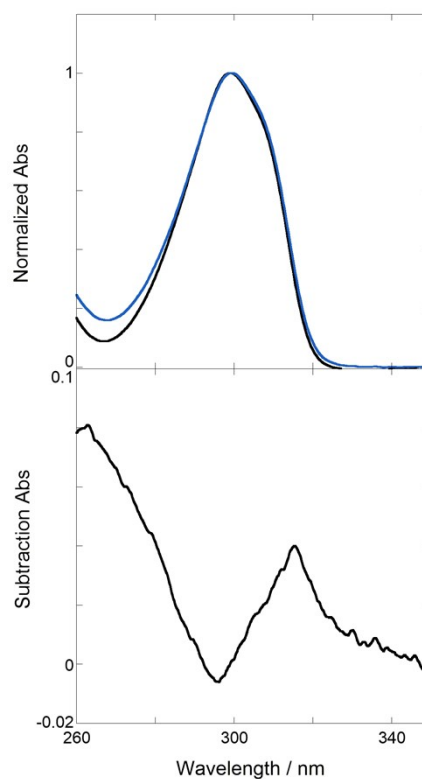

**Fig. S60** Normalized UV/vis (normalized at 299 nm; top) and subtraction UV (bottom) spectra of *in-(R<sub>p</sub>)/out-(S<sub>p</sub>)-MUJ1* (91  $\mu$ M) at 0.1 (black) and 320 MPa (light blue) in MCH at room temperature, measured in a high-pressure cell.

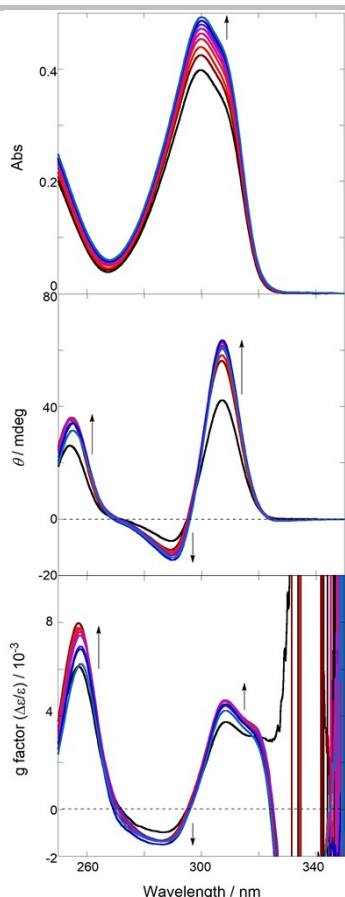

**Fig. S61** UV/vis (top), CD (middle), and anisotropy (bottom) spectra of *in*-( $R_p$ )/*out*-( $S_p$ )-**MUJ2** (120  $\mu$ M) at 0.1, 40, 80, 120, 160, 200, 240, 280, and 320 MPa (from black to light blue) in MCH at room temperature, measured in a high-pressure cell.

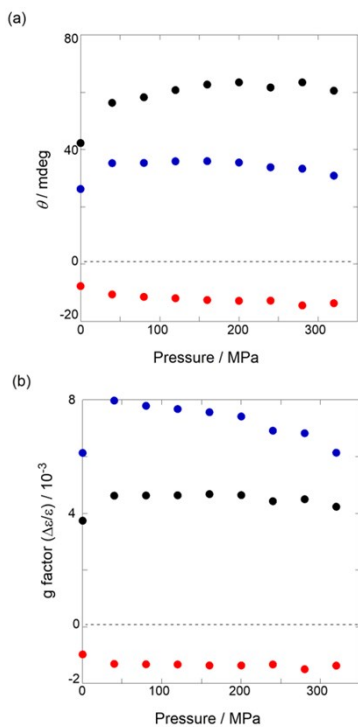

**Fig. S62** Plots of (a) ellipticity changes at 307 (black), 290 (red), and 254 nm (blue) and (b) anisotropy changes at 308 (black), 287 (red), and 257 nm (blue) for *in*-( $R_p$ )/*out*-( $S_p$ )-**MUJ2** in MCH as a function of pressure.

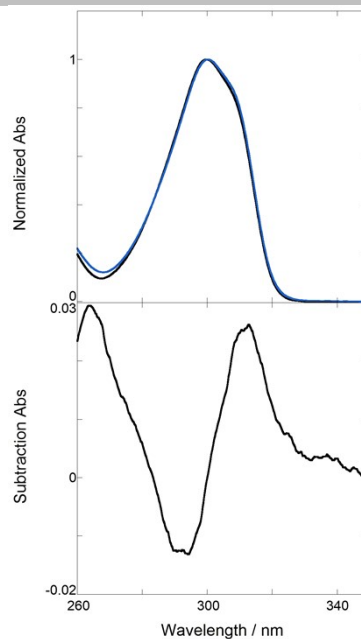

**Fig. S63** Normalized UV/vis (normalized at 300 nm; top) and subtraction UV (bottom) spectra of *in*-( $R_p$ )/*out*-( $S_p$ )-**MUJ2** (120  $\mu$ M) at 0.1 (black) and 320 MPa (light blue) in MCH at room temperature, measured in a high-pressure cell.

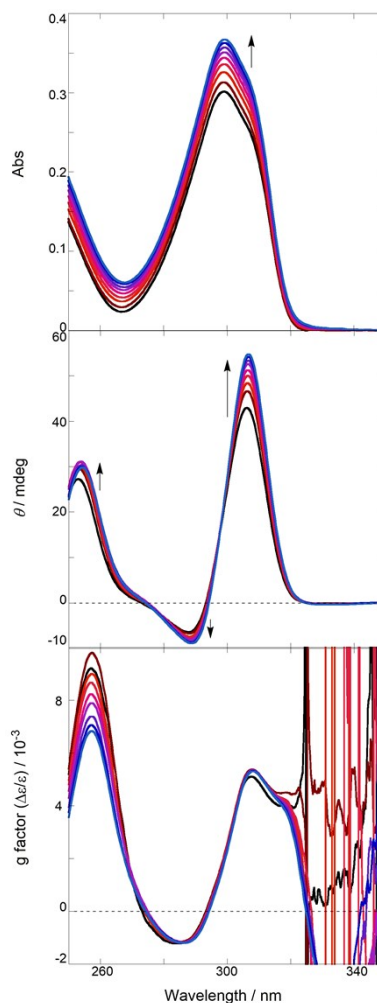

**Fig. S64** UV/vis (top), CD (middle), and anisotropy (bottom) spectra of *in*-( $R_p$ )/*out*-( $S_p$ )-**MUJ3** (94  $\mu$ M) at 0.1, 40, 80, 120, 160, 200, 240, 280, and 320 MPa (from black to light blue) in MCH at room temperature, measured in a high-pressure cell.

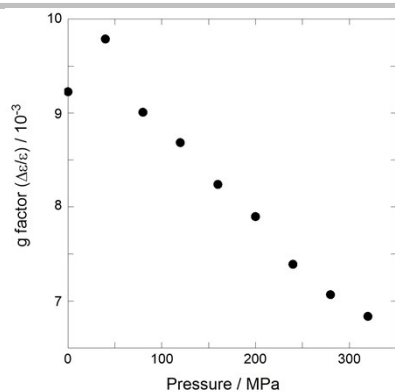

**Fig. S65** Plots of anisotropy changes at 257 nm for *in*-( $R_p$ )/*out*-( $S_p$ )-**MUJ3** in MCH as a function of pressure.

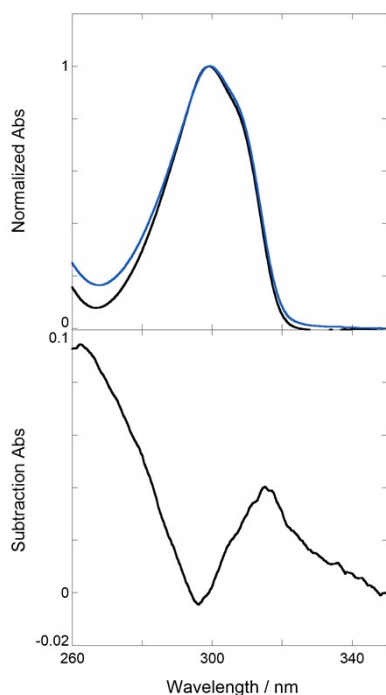

**Fig. S66** Normalized UV/vis (normalized at 299 nm; top) and subtraction UV (bottom) spectra of *in*-( $R_p$ )/*out*-( $S_p$ )-**MUJ3** (94  $\mu$ M) at 0.1 (black) and 320 MPa (light blue) in MCH at room temperature, measured in a high-pressure cell.

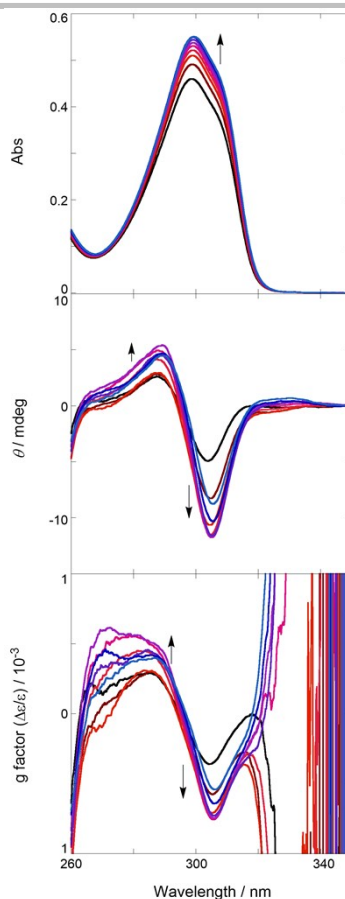

**Fig. S67** UV/vis (top), CD (middle), and anisotropy (bottom) spectra of *in*-( $R_p$ )/*out*-( $S_p$ )-**MUJ1** (191  $\mu$ M) at 0.1, 40, 80, 120, 160, 200, 240, 280, and 320 MPa (from black to light blue) in *n*-H at room temperature, measured in a high-pressure cell.

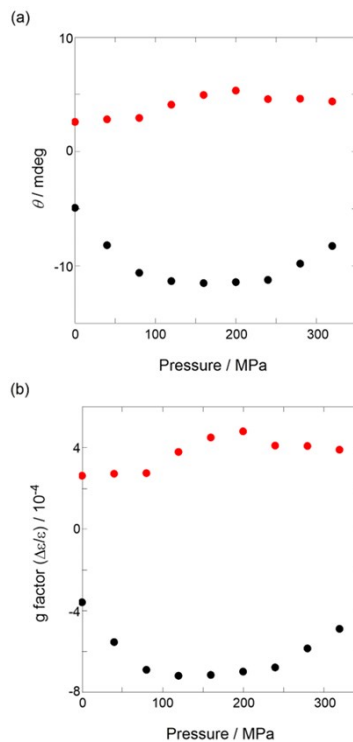

**Fig. S68** Plots of (a) ellipticity changes at 304 (black) and 288 nm (red) and (b) anisotropy changes at 304 (black) and 288 nm (red) for *in*-( $R_p$ )/*out*-( $S_p$ )-**MUJ1** in *n*-H as a function of pressure.

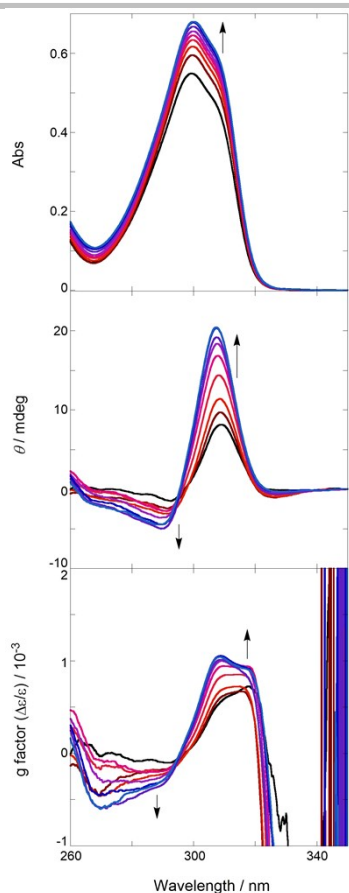

**Fig. S69** UV/vis (top), CD (middle), and anisotropy (bottom) spectra of *in*-( $R_p$ )/*out*-( $S_p$ )-MUJ2 (142  $\mu$ M) at 0.1, 40, 80, 120, 160, 200, 240, 280, and 320 MPa (from black to blue) in *n*-H at room temperature, measured in a high-pressure cell.

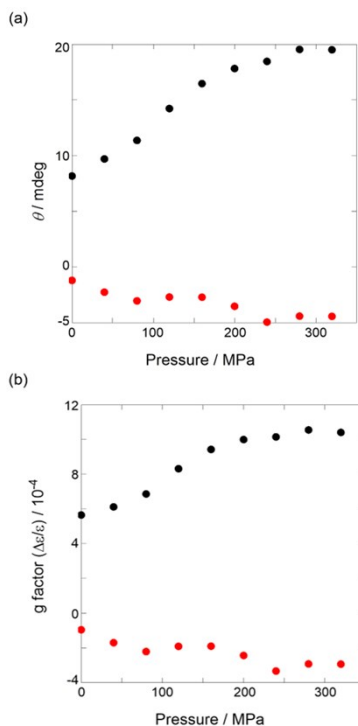

**Fig. S70** Plots of (a) ellipticity changes at 309 (black) and 290 nm (red) and (b) anisotropy changes at 309 (black) and 290 nm (red) for *in*-( $R_p$ )/*out*-( $S_p$ )-MUJ2 in *n*-H as a function of pressure.

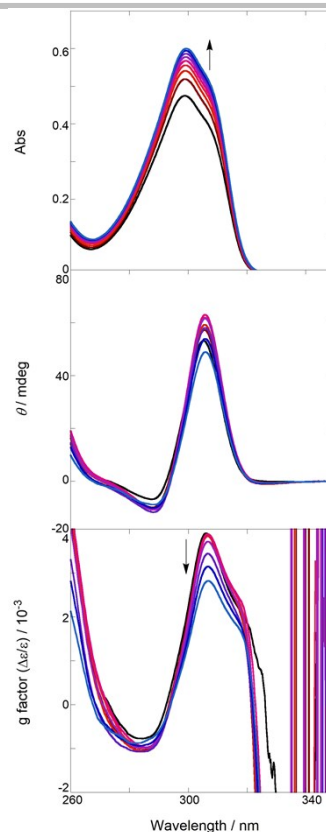

**Fig. S71** UV/vis (top), CD (middle), and anisotropy (bottom) spectra of *in*-( $R_p$ )/*out*-( $S_p$ )-MUJ3 (133  $\mu$ M) at 0.1, 40, 80, 120, 160, 200, 240, 280, and 320 MPa (from black to light blue) in *n*-H at room temperature, measured in a high-pressure cell.

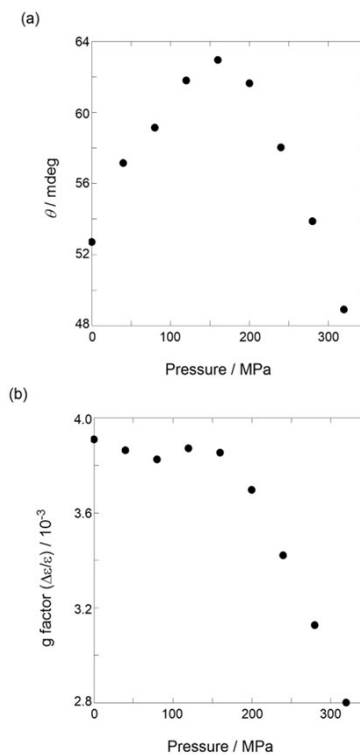

**Fig. S72** Plots of (a) ellipticity changes at 306 nm and (b) anisotropy changes at 306 nm for *in*-( $R_p$ )/*out*-( $S_p$ )-MUJ3 in *n*-H as a function of pressure.

#### 4. Pressure Effects on the Anisotropy (g) Factors of *in*-( $R_p$ )/*out*-( $S_p$ )-MUJs

**Table S1** Pressure Effects on the Anisotropy (g) Factor of MUJs at the Extremum ( $310 \pm 1$  nm)

| Solvent     | $E_T^{[a]}$ | <i>in</i> -( $R_p$ )/ <i>out</i> -( $S_p$ )-MUJ1 |                                            |                                | <i>in</i> -( $R_p$ )/ <i>out</i> -( $S_p$ )-MUJ2 |                                            |                                | <i>in</i> -( $R_p$ )/ <i>out</i> -( $S_p$ )-MUJ3 |                                            |                                |
|-------------|-------------|--------------------------------------------------|--------------------------------------------|--------------------------------|--------------------------------------------------|--------------------------------------------|--------------------------------|--------------------------------------------------|--------------------------------------------|--------------------------------|
|             |             | $g_{310}^{0.1\text{MPa}} / 10^{-6}$ [b]          | $g_{310}^{P_{\text{max}}}$ / $10^{-6}$ [c] | $\Delta g_{310} / 10^{-6}$ [d] | $g_{310}^{0.1\text{MPa}} / 10^{-6}$ [b]          | $g_{310}^{P_{\text{max}}}$ / $10^{-6}$ [c] | $\Delta g_{310} / 10^{-6}$ [d] | $g_{310}^{0.1\text{MPa}} / 10^{-6}$ [b]          | $g_{310}^{P_{\text{max}}}$ / $10^{-6}$ [c] | $\Delta g_{310} / 10^{-6}$ [d] |
| <i>n</i> -H | 30.9        | -359                                             | -490                                       | -131                           | 565                                              | 1040                                       | 475                            | 3910                                             | 2800                                       | -1110                          |
| MCH         | ~31         | 4260                                             | 4340                                       | 80                             | 3740                                             | 4230                                       | 490                            | 5100                                             | 5250                                       | 150                            |
| CTC         | 32.5        | 1720                                             | 899 <sup>[e]</sup>                         | -821 <sup>[f]</sup>            | 2170                                             | 1360 <sup>[e]</sup>                        | -810 <sup>[f]</sup>            | 2250                                             | 1480 <sup>[e]</sup>                        | -770 <sup>[f]</sup>            |
| THF         | 37.4        | -1960                                            | -3400                                      | -1440                          | 1200                                             | 558                                        | -642                           | 3140                                             | 809                                        | -2330                          |
| EA          | 38.1        | -1310                                            | -225                                       | 1090                           | 2270                                             | 3040                                       | 770                            | 2490                                             | 2420                                       | -70                            |
| CHL         | 39.1        | -798                                             | -744                                       | 54                             | 3520                                             | 2970 <sup>[g]</sup>                        | -550 <sup>[h]</sup>            | 842                                              | -124                                       | -966                           |
| DCM         | 41.1        | -3630                                            | -2660                                      | 970                            | -1940                                            | 47                                         | 1987                           | -3910                                            | -2950                                      | 960                            |
| AN          | 46.0        | -3390                                            | -2240                                      | 1150                           | -1560                                            | 3440                                       | 5000                           | -3690                                            | -2280                                      | 1410                           |

[a] Reichardt's solvent polarity parameter; see reference 6.

[b] Anisotropy factor at 0.1 MPa.

[c] Anisotropy factor at the highest pressure applied, i.e., 320 MPa, unless otherwise noted.

[d]  $\Delta g = g_{310}^{320\text{MPa}} - g_{310}^{0.1\text{MPa}}$ , unless otherwise noted.

[e] Anisotropy factor at 160 MPa.

[f]  $\Delta g = g_{310}^{160\text{MPa}} - g_{310}^{0.1\text{MPa}}$ .

[g] Anisotropy factor at 200 MPa.

[h]  $\Delta g = g_{310}^{200\text{MPa}} - g_{310}^{0.1\text{MPa}}$ .

#### 5. DFT Calculations of the van der Waals Volumes of the *in*- and *out*-Conformers of MUJs

The density functional theory (DFT) calculations were used for the optimization of the ground-state geometries at the B3LYP/6-31g (d) level. All the calculations were performed on Gaussian 09W. The van der Waals volumes were calculated for the geometry-optimized *in*- and *out*-conformers of MUJ by the Materials Studio 2017.

**Table S2** DFT-Calculated Changes in Energy ( $\Delta E$ ) and van der Waals Volume ( $\Delta V$ ) upon Self-Complexation of MUJs.

| Host        | $E_{\text{in}}^{[a]}$ /a.u. | $\Delta E_{\text{in-out}}^{[b]}$ /kJ mol <sup>-1</sup> | $V_{\text{in}}^{[c]}$ /Å <sup>3</sup> | $\Delta V_{\text{in-out}}^{[d]}$ /Å <sup>3</sup> |
|-------------|-----------------------------|--------------------------------------------------------|---------------------------------------|--------------------------------------------------|
| <b>MUJ1</b> | -3271.87492083              | 0.59                                                   | 944.46 <sup>[e]</sup>                 | -0.30                                            |
| <b>MUJ2</b> | -3203.50573109              | 3.89                                                   | 986.79 <sup>[e]</sup>                 | -0.36                                            |
| <b>MUJ3</b> | -3579.54900355              | -9.25                                                  | 1029.70 <sup>[e]</sup>                | -0.26                                            |

[a] The energy of *in*-( $S_p$ )-MUJ geometry-optimized *in vacuo* by the DFT method at the B3LYP/6-31G(d) level. [b] The energy change upon self-complexation, evaluated by subtracting the energy of *out*-( $S_p$ )-MUJ from that of *in*-( $S_p$ )-MUJ; [c] The van der Waals volume of *in*-( $S_p$ )-MUJ. [d] The volume change upon self-complexation, evaluated by subtracting the vdW volume of *out*-( $S_p$ )-MUJ from that of the *in*-( $S_p$ )-MUJ; [e] The van der Waals volume calculated by Materials Studio 2017.

## 6. Complexation of Solvent Molecules with 1,4-Diethoxy-pillar[5]arene (DEP[5]) in Methylcyclohexane

Isothermal titration calorimetry (ITC) experiments were performed using a Microcal VP-ITC instrument. Typically, an MCH solution of guest solvent (300 - 350 mM) was added with stirring to an MCH solution of DEP[5] (1.0 mM) placed in a calorimeter cuvette at 25 °C under the atmospheric pressure (0.1 MPa). The thermograms obtained were analyzed by assuming the 1:1 stoichiometry to give the association constant ( $K_a$ ) and the thermodynamic parameters ( $\Delta H^\circ$  and  $\Delta S^\circ$ ).

However, some of the guest solvents did not develop any detectable heat (CTC and CHL) or mix with MCH (AN), and accordingly only the  $K_a$  values were determined for these guests by  $^1\text{H}$  NMR spectral titration (**Supplementary Table 3**).

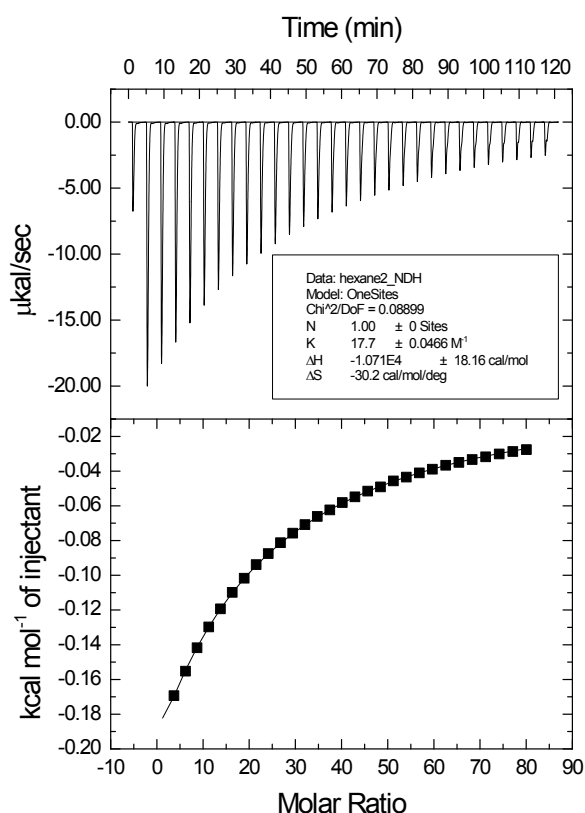

**Fig. S73** Calorimetric titration data for the complexation of host DEP[5] (1.0 mM) with *n*-hexane (350 mM) in methylcyclohexane at 25 °C, which gave the 1:1 association constant ( $K_a$ ) of 17.7  $\text{M}^{-1}$ .

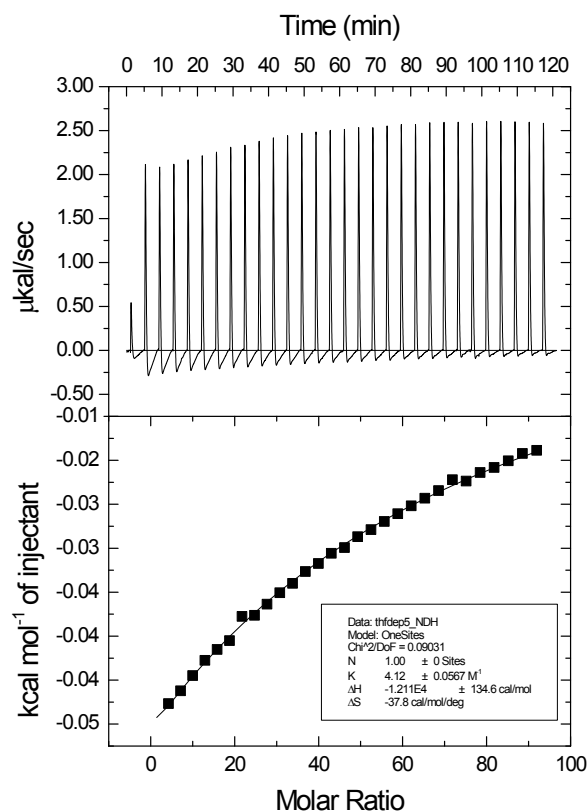

**Fig. S74** Calorimetric titration data for the complexation of host DEP[5] (1.0 mM) with tetrahydrofuran (400 mM) in methylcyclohexane at 25 °C, which gave the 1:1 association constant ( $K_a$ ) of 4.1  $\text{M}^{-1}$ .

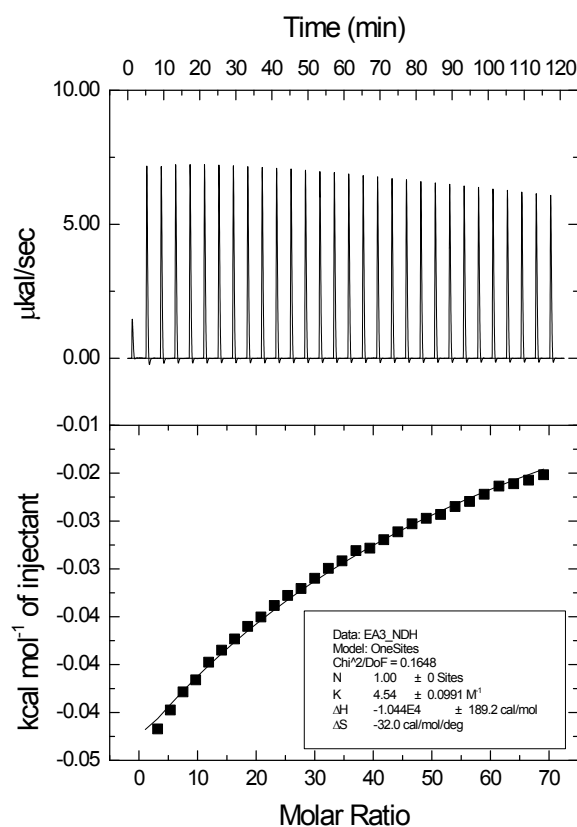

**Fig. S75** Calorimetric titration data for the complexation of host DEP[5] (1.0 mM) with ethyl acetate (300 mM) in methylcyclohexane at 25 °C, which gave the 1:1 association constant ( $K_a$ ) of 4.5  $\text{M}^{-1}$ .

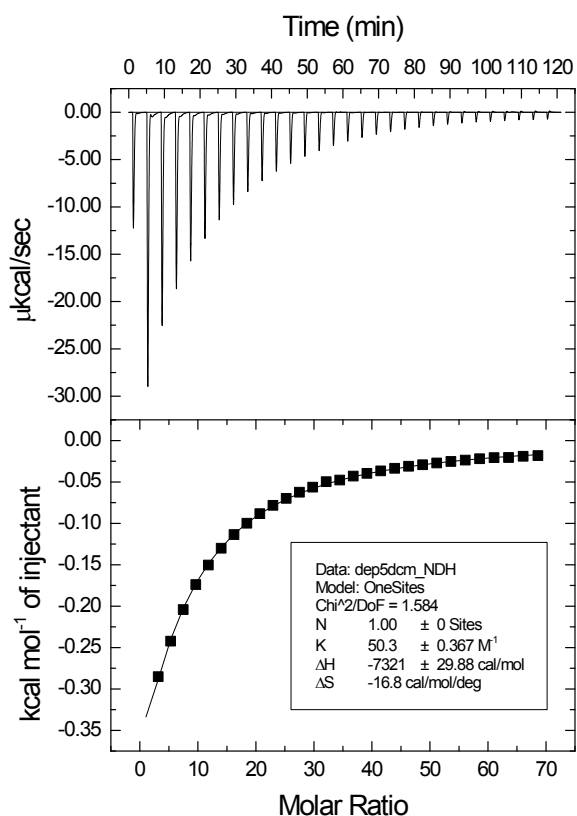

**Fig. S76** Calorimetric titration data for the complexation of host DEP[5] (1.0 mM) with dichloromethane (300 mM) in methylcyclohexane at 25 °C, which gave the 1:1 association constant ( $K_a$ ) of 50.3 M<sup>-1</sup>.

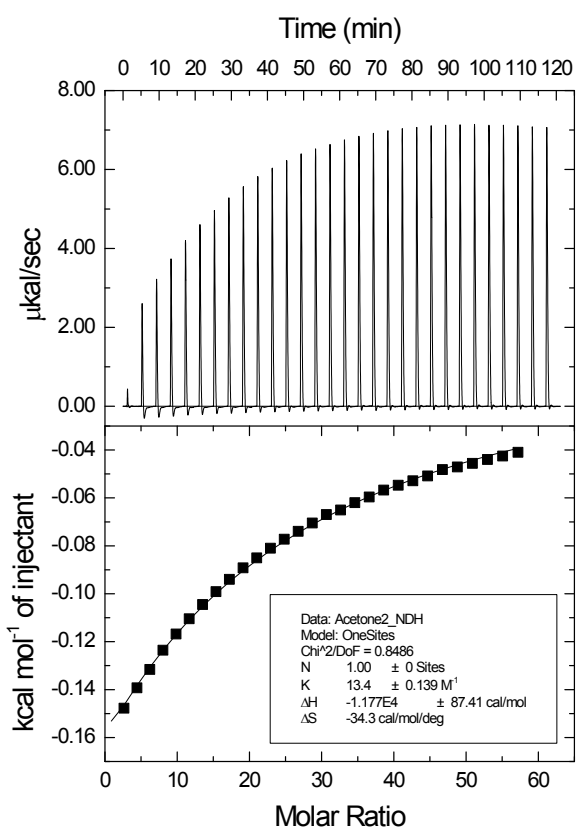

**Fig. S77** Calorimetric titration data for the complexation of host DEP[5] (1.0 mM) with acetone (250 mM) in methylcyclohexane at 25 °C, which gave the 1:1 association constant ( $K_a$ ) of 13.4 M<sup>-1</sup>.

**Table S3** Association Constants ( $K_a$ ) and Thermodynamic Parameters for the 1:1 Complexation of Some Solvent Molecules with DEP[5] Determined by Isothermal Titration Calorimetry in MCH or by <sup>1</sup>H NMR Spectral Titration in MCH-*d*<sub>14</sub> at 25 °C under Ambient Pressure (0.1 MPa)

| Guest                           | $K_a$ / M <sup>-1</sup>    | $\Delta H^\circ$ / kcal mol <sup>-1</sup> | $\Delta S^\circ$ / cal mol <sup>-1</sup> K <sup>-1</sup> |
|---------------------------------|----------------------------|-------------------------------------------|----------------------------------------------------------|
| <i>n</i> -Hexane ( <i>n</i> -H) | 17.80 ± 0.05               | -10.71 ± 0.02                             | -30.2                                                    |
| Carbon Tetrachloride (CTC)      | ~0 <sup>[a]</sup>          | ~0                                        |                                                          |
| Tetrahydrofuran (THF)           | 4.12 ± 0.06                | -12.1 ± 0.1                               | -37.8                                                    |
| Ethyl Acetate (EA)              | 4.54 ± 0.10                | -10.4 ± 0.2                               | -32.0                                                    |
| Chloroform (CHL)                | 0.63 ± 0.02 <sup>[b]</sup> | ~0                                        |                                                          |
| Acetone                         | 13.4 ± 0.1                 | -11.77 ± 0.09                             | -34.3                                                    |
| Dichloromethane (DMC)           | 50.3 ± 0.4                 | -7.32 ± 0.03                              | -16.8                                                    |
| Acetonitrile (AN)               | 550 ± 30 <sup>[c]</sup>    |                                           |                                                          |

[a] The heat effect observed was too small to determine the parameters by ITC under the condition employed, which means that  $K_a$  is very small or the  $\Delta H^\circ$  value is incidentally close to zero. Further examinations by NMR spectral titration at much higher host/guest concentrations also showed only extremely small chemical shift changes (see Fig. S 81, Supplementary Table 6, and relevant discussion) to reveal that no complexation or perching takes place between DEP[5] and CTC, i.e.,  $K_a \sim 0$ . [b] The heat effect observed was too small to determine the parameters by ITC under the condition employed, which means that  $K_a$  is very small or the  $\Delta H^\circ$  value is incidentally close to zero. Further examinations by NMR spectral titration showed small, yet appreciable chemical shift changes (see Fig. Ss 79-80) to give the  $K_a$  value. [c] The low solubility of AN in MCH did not allow us to obtain reliable data by ITC, and hence only the  $K_a$  value was determined by NMR spectral titration in MCH-*d*<sub>14</sub> (Fig. Ss 82-83) with sonication after each addition of AN to make the solution homogeneous.

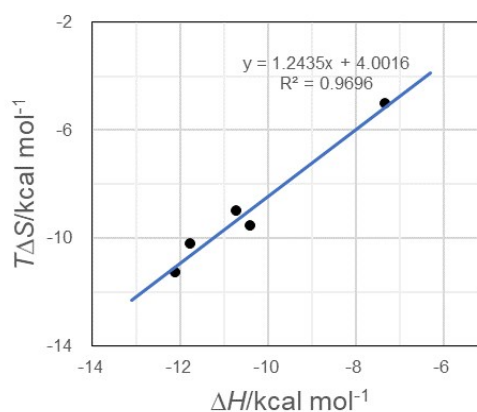

**Fig. S78** Enthalpy-entropy compensation plot obtained from the thermodynamic parameters for the complexation of DEP[5] with *n*-H, THF, EA, DCM, and acetone in MCH (Supplementary Table 3); the regression line:  $y = 1.24x + 4.0$  ( $r^2 = 0.9696$ ).

**Discussion:** The available thermodynamic parameter listed in Supplementary Table 3 indicate that the complexation of guest solvent with DEP[5] in MCH is obviously driven by the negative enthalpy changes ( $\Delta H^\circ$ ) of -7 to -12 kcal mol<sup>-1</sup>, which are moderately cancelled by the entropy changes ( $\Delta S^\circ$ ) of -17 to -38 cal mol<sup>-1</sup> K<sup>-1</sup> or the  $T\Delta S^\circ$  values of -5 to -11 kcal mol<sup>-1</sup>. Interestingly, the thermodynamic parameters obtained exhibit a compensatory  $\Delta H^\circ$ - $\Delta S^\circ$  relationship ( $r^2 = 0.9696$ ) with a slope of 1.24 and an intercept of 4.0, implying that the complexation mechanism and the controlling factors are shared among the guest molecules examined.<sup>[7]</sup>

## 7. Anisotropy Factors of Pure *out*-MUJs

**Table S4** Anisotropy ( $g_{310}^{out}$ ) Factors of Pure *out*-( $R_p$ )-Conformers of **MUJ**s Estimated by Adding a >2000-fold Excess of Strong Binder 1,4-Dicyanobutane<sup>[a]</sup>

| Solvent ( $E_T$ )                 | $g_{310}^{out}$ |             |             | Average | Std. dev. | $g_{310}^{MUJ1}/g_{310}^{MUJ3}$ |
|-----------------------------------|-----------------|-------------|-------------|---------|-----------|---------------------------------|
|                                   | <b>MUJ1</b>     | <b>MUJ2</b> | <b>MUJ3</b> |         |           |                                 |
| <i>n</i> -H (30.9)                | 0.013           | 0.016       | 0.016       | 0.015   | 0.002     | 0.81                            |
| MCH (~31)                         | 0.013           | 0.015       | 0.016       | 0.015   | 0.002     | 0.79                            |
| CTC (32.5)                        | 0.007           | 0.008       | 0.009       | 0.008   | 0.001     | 0.81                            |
| THF (37.4)                        | 0.013           | 0.015       | 0.016       | 0.015   | 0.001     | 0.82                            |
| EA (38.1)                         | 0.012           | 0.015       | 0.016       | 0.014   | 0.002     | 0.77                            |
| CHL (39.1)                        | [b]             | 0.013       | 0.014       | 0.014   | 0.001     | [b]                             |
| DCM (41.1)                        | 0.011           | 0.013       | 0.015       | 0.013   | 0.002     | 0.77                            |
| AN (46.0)                         | 0.010           | 0.010       | 0.014       | 0.011   | 0.002     | 0.75                            |
| Average                           | 0.011           | 0.013       | 0.015       |         |           |                                 |
| Std. dev.                         | 0.002           | 0.003       | 0.003       |         |           |                                 |
| Average <sup>[c]</sup>            | 0.012           | 0.014       | 0.015       |         |           |                                 |
| Std. dev. <sup>[c]</sup>          | 0.001           | 0.002       | 0.001       |         |           |                                 |
| $g_{310}^{min}/g_{310}^{max}$     | 0.53            | 0.54        | 0.53        |         |           |                                 |
| $g_{310}^{min}/g_{310}^{max [c]}$ | 0.79            | 0.63        | 0.85        |         |           |                                 |

[a] Note that, only in this experiment, the antipodal *in*-( $S_p$ )/*out*-( $R_p$ )-conformers (the first-eluting enantiomers on chiral HPLC) were used and hence all the  $g_{310}^{out}$  factors shown here are positive. Logically, the  $g_{310}^{out}$  factors of the *out*-( $S_p$ )-conformers used in all the other experiments should be negative. [b] Not determined. [c] Calculated without including the data obtained in CTC, which show significant deviations from those in other solvents, irrespective of the subring type incorporated in **MUJ**.



## 8. <sup>1</sup>H NMR Spectral Titration of DEP[5] in MCH-*d*<sub>14</sub>

<sup>1</sup>H NMR Spectral Titration of DEP[5] with CHL

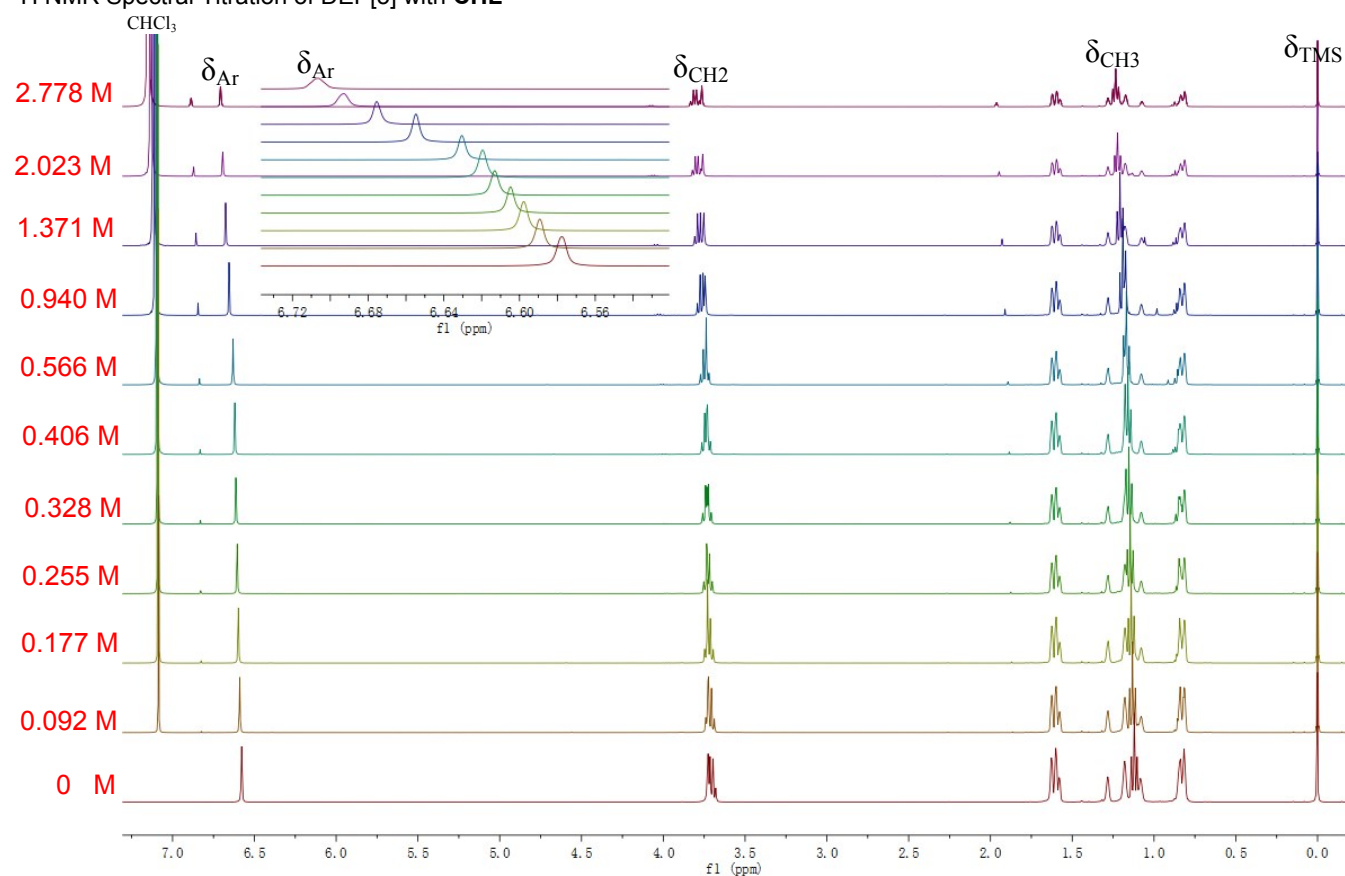

**Fig. S79** <sup>1</sup>H NMR spectra (400 MHz) of DEP[5] (4.2 mM) upon titration with CHL (0-2.78 M) in MCH-*d*<sub>14</sub> at room temperature.

**Table S5** Chemical shifts of the aromatic and ethoxy protons of DEP[5] (4.2 mM) in the presence of 0-2.78 M CHL

| [CHL]/M              | $\delta_{Ar}/\text{ppm}$ | $\delta_{CH_2}/\text{ppm}$ | $\delta_{CH_3}/\text{ppm}$ |
|----------------------|--------------------------|----------------------------|----------------------------|
| 0                    | 6.578                    | 3.697                      | 1.121                      |
| 0.092                | 6.589                    | 3.705                      | 1.132                      |
| 0.177                | 6.598                    | 3.712                      | 1.139                      |
| 0.255                | 6.605                    | 3.718                      | 1.146                      |
| 0.328                | 6.613                    | 3.724                      | 1.154                      |
| 0.406                | 6.619                    | 3.730                      | 1.159                      |
| 0.566                | 6.630                    | 3.738                      | 1.169                      |
| 0.940                | 6.655                    | 3.757                      | 1.190                      |
| 1.371                | 6.675                    | 3.773                      | 1.208                      |
| 2.023                | 6.693                    | 3.787                      | 1.223                      |
| 2.778                | 6.706                    | 3.796                      | 1.234                      |
| $\Delta\delta^{[a]}$ | 0.128                    | 0.099                      | 0.113                      |

[a]  $\Delta\delta = \delta(2.778 \text{ M}) - \delta(0 \text{ M})$ .

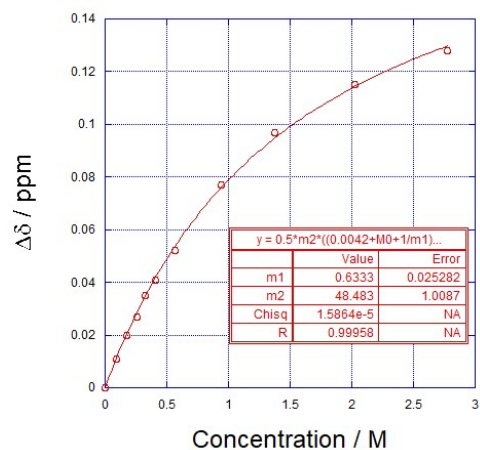

**Figure S80** Chemical shift changes of the aromatic proton plotted against the CHL concentration and the least-square-means fit to the 1:1 complexation model to determine the  $K_a$  value;  $K_a = 0.63 \pm 0.02 \text{ M}^{-1}$ .

# <sup>1</sup>H NMR Spectral Titration of DEP[5] with CTC

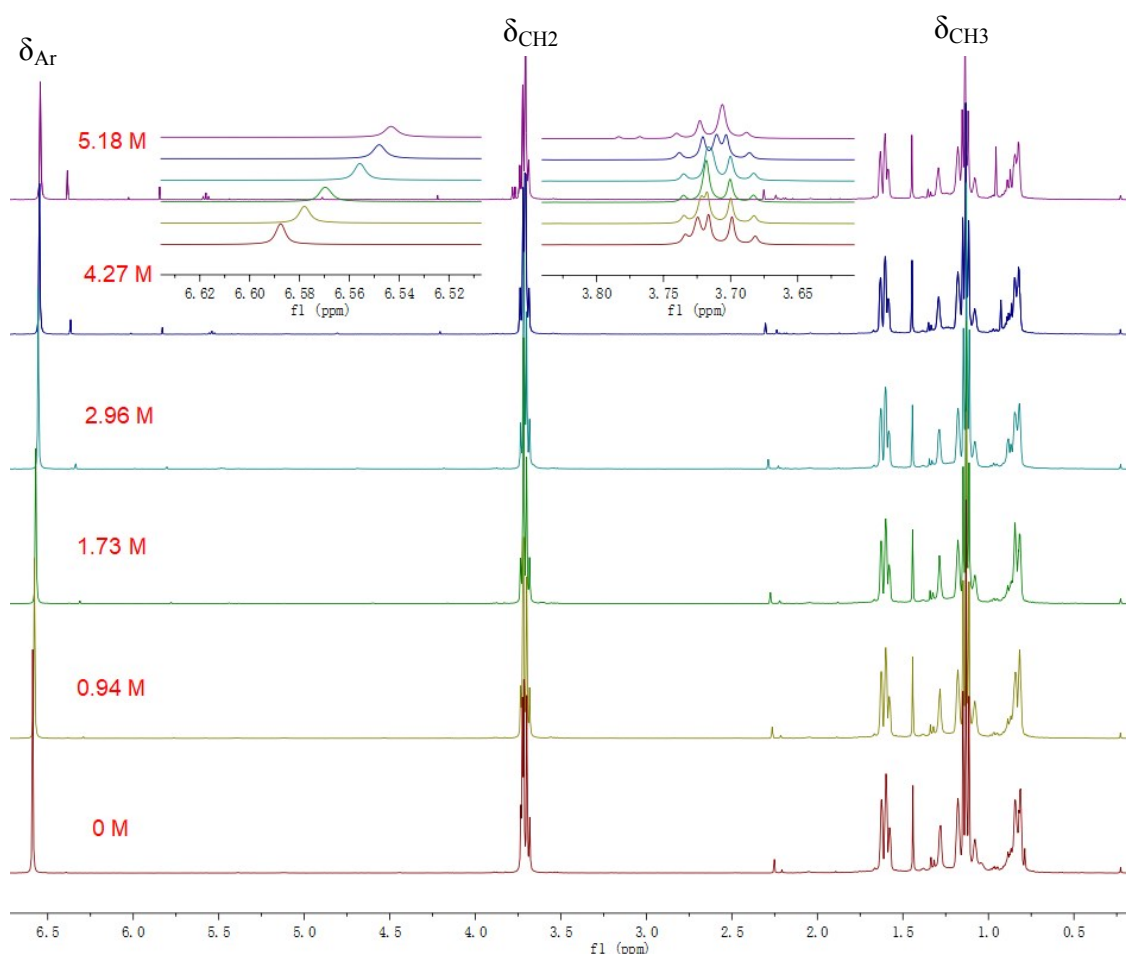

Fig. S81 <sup>1</sup>H NMR spectral titration (400 MHz) of DEP[5] (4.2 mM) with CTC (0-5.18 M) in MCH-*d*<sub>14</sub> at room temperature.

Table S6 Chemical shifts of the aromatic and ethoxy protons of DEP[5] (~4.2 mM) in the presence of 0-5.18 M CTC

| [CTC]/M              | $\delta_{Ar}/\text{ppm}$ | $\delta_{CH_2}/\text{ppm}$ | $\delta_{CH_3}/\text{ppm}$ |
|----------------------|--------------------------|----------------------------|----------------------------|
| 0.0                  | 6.588                    | 3.699                      | 1.131                      |
| 0.94                 | 6.578                    | 3.700                      | 1.131                      |
| 1.73                 | 6.570                    | 3.700                      | 1.130                      |
| 2.96                 | 6.556                    | 3.700                      | 1.129                      |
| 4.27                 | 6.548                    | 3.703                      | 1.133                      |
| 5.18                 | 6.543                    | 3.706                      | 1.136                      |
| $\Delta\delta^{[a]}$ | -0.045                   | -0.007                     | -0.005                     |

[a]  $\Delta\delta = \delta(5.18 \text{ M}) - \delta(0 \text{ M})$ .

<sup>1</sup>H NMR Spectral Titration of DEP[5] with AN

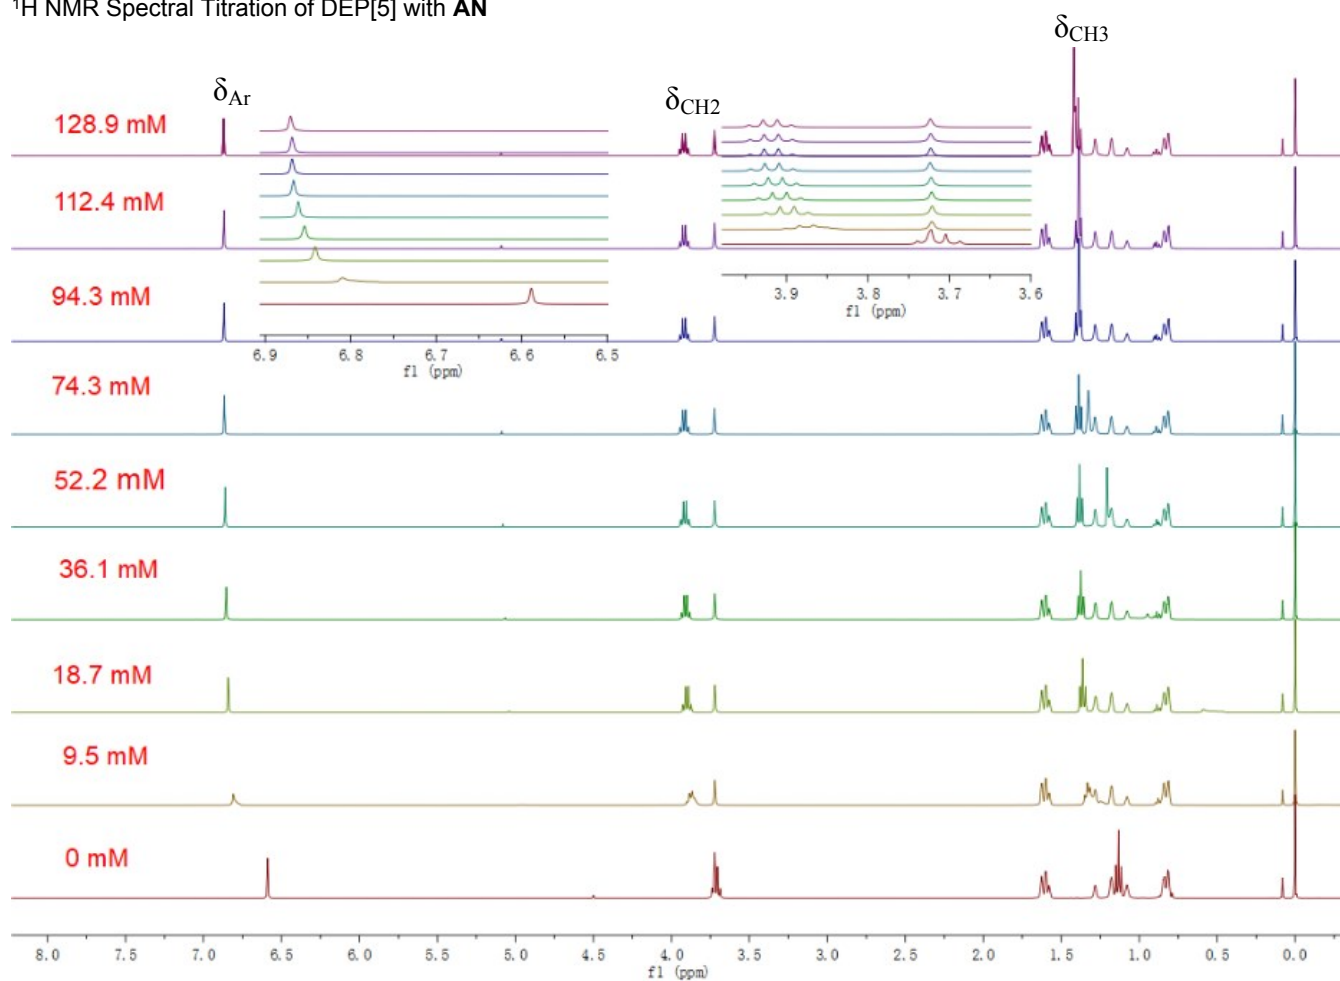

**Fig. S82** <sup>1</sup>H NMR spectra (400 MHz) of DEP[5] (4.3 mM) upon titration with AN (0-128.9 mM) in MCH-*d*<sub>14</sub> at room temperature.

**Table S7** Chemical shifts of the aromatic and ethoxy protons of DEP[5] (4.3 mM) in the presence of 0-128.9 mM AN

| [AN]/mM              | $\delta_{Ar}$ /ppm | $\delta_{CH_2}$ /ppm | $\delta_{CH_3}$ /ppm |
|----------------------|--------------------|----------------------|----------------------|
| 0.0                  | 6.589              | 3.704                | 1.132                |
| 9.5                  | 6.810              | 3.850                | 1.333                |
| 18.7                 | 6.842              | 3.891                | 1.362                |
| 36.1                 | 6.854              | 3.900                | 1.375                |
| 52.2                 | 6.861              | 3.905                | 1.382                |
| 74.3                 | 6.867              | 3.909                | 1.388                |
| 94.3                 | 6.869              | 3.910                | 1.390                |
| 112.4                | 6.869              | 3.910                | 1.390                |
| 128.9                | 6.871              | 3.911                | 1.393                |
| $\Delta\delta^{[a]}$ | 0.282              | 0.207                | 0.261                |

[a]  $\Delta\delta = \delta(0.1289 \text{ M}) - \delta(0 \text{ M})$ .

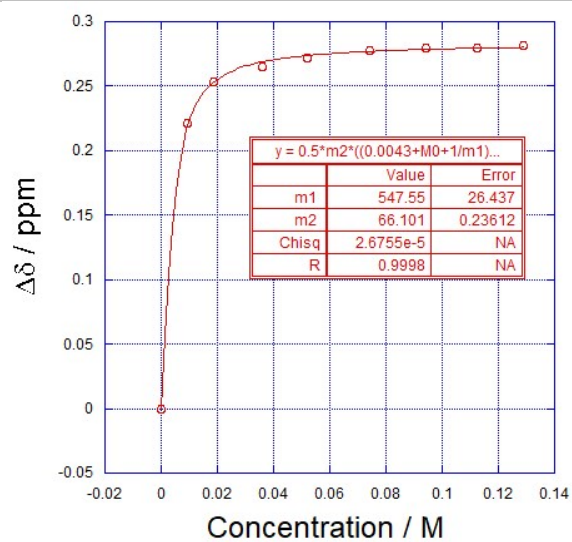

**Figure S83** Chemical shift changes of the aromatic proton plotted against the AN concentration and the least-square-means fit to the 1:1 complexation model to determine the  $K_a$  value;  $K_a = 550 \pm 30 \text{ M}^{-1}$ .

## 9. Appendix

**Table S8** Geometries of (a) *in*-( $S_p$ )- and (b) *out*-( $R_p$ )-**MUJ1**, (c) *in*-( $S_p$ )- and (d) *out*-( $R_p$ )-**MUJ2**, and (e) *in*-( $S_p$ )- and (f) *out*-( $R_p$ )-**MUJ3**, all optimized at the DFT-B3LYP/6-31G(d) Level

### (a) *in*-( $S_p$ )-**MUJ1**

| Atom | x           | y           | x           |
|------|-------------|-------------|-------------|
| C    | -1.10711700 | 3.46444900  | -2.15496300 |
| C    | 0.28648300  | 3.56097300  | -2.18410100 |
| C    | 0.98685900  | 4.03711200  | -1.06222000 |
| C    | 0.24364100  | 4.43729800  | 0.05299700  |
| C    | -1.15330500 | 4.35008000  | 0.07605100  |
| C    | -1.84933300 | 3.84232200  | -1.03321600 |
| C    | -3.36424600 | 3.67550500  | -1.02906400 |
| C    | -4.37881200 | -0.02172500 | -1.09436800 |
| C    | -3.98583700 | 1.24485700  | -1.53040200 |
| C    | -3.80530900 | 2.28178600  | -0.60168000 |
| C    | -3.99128400 | 1.98926300  | 0.75162500  |
| C    | -4.24212900 | 0.68880600  | 1.19417100  |
| C    | -4.46141900 | -0.33855200 | 0.26349900  |
| C    | -4.72302500 | -1.77503800 | 0.69620900  |
| O    | -4.31430200 | 0.33060800  | 2.52368700  |
| O    | -3.77733300 | 1.56975600  | -2.85366700 |
| C    | -3.58061400 | 0.56230100  | -3.83431000 |
| C    | -2.50814300 | -0.49225200 | -3.52219000 |
| O    | -1.40969600 | 0.10627300  | -2.87235800 |
| C    | -0.55009200 | -0.84250500 | -2.24905000 |
| C    | 0.28080500  | -0.20423500 | -1.15459600 |
| O    | -0.51668200 | 0.07597000  | -0.01095000 |
| C    | -3.76251700 | 1.15583300  | 3.53817100  |
| C    | -2.31201800 | 1.61432400  | 3.33022100  |
| O    | -1.54466000 | 0.57464700  | 2.76588600  |
| C    | -0.32197600 | 1.03691100  | 2.20251600  |
| C    | 0.23521900  | 0.05148300  | 1.19487700  |
| C    | 3.55277000  | 1.89660800  | -1.75971000 |
| C    | 4.12130900  | 0.64769500  | -1.48837500 |
| C    | 4.34034400  | 0.23667200  | -0.16998500 |
| C    | 3.99931800  | 1.12912200  | 0.85930800  |
| C    | 3.43783700  | 2.37965100  | 0.58555500  |
| C    | 3.18446200  | 2.77809500  | -0.74475100 |
| C    | 2.50884700  | 4.10668000  | -1.06011800 |
| C    | 4.86724400  | -1.15435900 | 0.15349600  |
| C    | 3.09975500  | -2.79427800 | -0.63238200 |
| C    | 2.01696100  | -3.65394200 | -0.41690400 |
| C    | 1.54459100  | -3.88340800 | 0.88807500  |
| C    | 2.21472500  | -3.26248300 | 1.94708400  |
| C    | 3.29976500  | -2.40492900 | 1.73219000  |
| C    | 3.74585000  | -2.14729600 | 0.42687600  |
| C    | 0.33023400  | -4.76661200 | 1.14699200  |
| C    | -1.75604200 | -4.07189900 | -0.13216400 |
| C    | -2.96438400 | -3.37678800 | -0.25672200 |
| C    | -3.44663400 | -2.59956800 | 0.80889500  |
| C    | -2.70483900 | -2.58114200 | 1.99222200  |
| C    | -1.50660700 | -3.28773400 | 2.12442500  |
| C    | -1.00039400 | -4.03114400 | 1.04456900  |
| O    | -1.91445200 | 4.73044300  | 1.16733900  |
| C    | -2.41203800 | 6.04313100  | 3.08829700  |
| C    | -1.31348100 | 5.56016200  | 2.15545400  |
| O    | 1.04834300  | 3.21202900  | -3.27466000 |
| C    | 1.44803100  | 2.45007000  | -5.49280300 |
| C    | 0.38303200  | 2.74785000  | -4.45039600 |
| O    | 3.09592100  | 3.28533600  | 1.56113400  |
| C    | 3.04138300  | 4.19862600  | 3.75580100  |

|   |             |             |             |
|---|-------------|-------------|-------------|
| C | 3.43163100  | 2.99525100  | 2.91425500  |
| O | 4.41482600  | -0.21561500 | -2.53807800 |
| C | 5.71769700  | -0.86296800 | -4.43496700 |
| C | 5.56208700  | 0.15055600  | -3.31465300 |
| O | 3.97689600  | -1.76330200 | 2.74822700  |
| C | 4.64711200  | -1.36455700 | 4.99412000  |
| C | 3.67525300  | -2.11018000 | 4.09483900  |
| O | 1.35585300  | -4.30849700 | -1.43142100 |
| C | 1.05927700  | -5.14672200 | -3.63761300 |
| C | 1.89313400  | -4.23939800 | -2.74871200 |
| O | -0.76541200 | -3.30617500 | 3.28523300  |
| C | -0.36637600 | -2.92217100 | 5.60198800  |
| C | -1.29757100 | -2.64530300 | 4.43362900  |
| O | -3.72971600 | -3.39529500 | -1.40940000 |
| C | -4.61620400 | -4.38384800 | -3.38360600 |
| C | -3.48694000 | -4.42075200 | -2.36695800 |
| H | -1.64750700 | 3.05488300  | -2.99748600 |
| H | 0.78550200  | 4.80399700  | 0.91712500  |
| H | -3.80315600 | 4.41105000  | -0.34878900 |
| H | -3.74399400 | 3.88406300  | -2.03316600 |
| H | -4.58427700 | -0.81116800 | -1.80637100 |
| H | -3.88865900 | 2.80203200  | 1.45990800  |
| H | -5.23013000 | -1.77659700 | 1.66501100  |
| H | -5.39151200 | -2.24804500 | -0.02908700 |
| H | -3.29975800 | 1.12906700  | -4.72695000 |
| H | -4.52331600 | 0.03757500  | -4.05897300 |
| H | -2.21338100 | -0.95415700 | -4.48368200 |
| H | -2.91224000 | -1.29346600 | -2.89385300 |
| H | 0.12869200  | -1.28029500 | -3.00223900 |
| H | -1.13984700 | -1.65583500 | -1.80618100 |
| H | 0.76091900  | 0.71335900  | -1.52382500 |
| H | 1.07579100  | -0.91965200 | -0.90393500 |
| H | -4.38402000 | 2.05084600  | 3.70372800  |
| H | -3.83406100 | 0.53588500  | 4.43683000  |
| H | -2.26638900 | 2.49674500  | 2.68230900  |
| H | -1.92050300 | 1.92101900  | 4.31895400  |
| H | -0.47785600 | 1.99850000  | 1.69567200  |
| H | 0.42342000  | 1.18792900  | 3.00440200  |
| H | 1.27629900  | 0.34801700  | 1.00591800  |
| H | 0.24875500  | -0.96280100 | 1.61887700  |
| H | 3.35545900  | 2.17229400  | -2.79018300 |
| H | 4.16241300  | 0.80749900  | 1.88128300  |
| H | 2.82658700  | 4.85273700  | -0.32580200 |
| H | 2.85040200  | 4.44402100  | -2.04390300 |
| H | 5.52180300  | -1.10113600 | 1.02748100  |
| H | 5.46192400  | -1.51587400 | -0.68985300 |
| H | 3.44816300  | -2.58277100 | -1.63693600 |
| H | 1.84419500  | -3.44095600 | 2.94867200  |
| H | 0.42190900  | -5.19940800 | 2.14825000  |
| H | 0.33063000  | -5.59171000 | 0.42839200  |
| H | -1.36615000 | -4.64760800 | -0.96334600 |
| H | -3.07160700 | -1.96532900 | 2.80191500  |
| H | -1.99059500 | 6.68866600  | 3.86681000  |
| H | -3.16566700 | 6.61134200  | 2.53417200  |
| H | -2.90936000 | 5.19739400  | 3.57494200  |
| H | -0.80785100 | 6.40815800  | 1.67180300  |
| H | -0.55302000 | 4.99599500  | 2.71660000  |
| H | 2.04408400  | 3.34350500  | -5.70656700 |
| H | 0.97859400  | 2.11651800  | -6.42509400 |
| H | 2.12106600  | 1.65895900  | -5.14534500 |
| H | -0.30779900 | 3.52318000  | -4.81386400 |
| H | -0.20173300 | 1.85083700  | -4.21328900 |
| H | 3.57291600  | 5.09416300  | 3.41883600  |

|   |             |             |             |   |             |             |             |
|---|-------------|-------------|-------------|---|-------------|-------------|-------------|
| H | 3.29110500  | 4.02079500  | 4.80755000  | C | 3.12305700  | -2.94846600 | -0.04973100 |
| H | 1.96526700  | 4.38833100  | 3.68396900  | C | -4.64924800 | -1.99367400 | -1.22101800 |
| H | 4.50936200  | 2.79339600  | 2.99649400  | C | -5.04011000 | -1.33501700 | -0.05151800 |
| H | 2.89638400  | 2.09540900  | 3.25115900  | C | -4.61283100 | -1.86070600 | 1.17915600  |
| H | 6.58531400  | -0.61312000 | -5.05554600 | C | -3.79328000 | -2.99270900 | 1.21193800  |
| H | 5.86122200  | -1.87005000 | -4.02944000 | C | -3.38404500 | -3.63777100 | 0.04109500  |
| H | 4.82660000  | -0.87235800 | -5.07131500 | C | -3.83706000 | -3.13089800 | -1.18768400 |
| H | 6.45388900  | 0.16691700  | -2.67035900 | C | -5.88388900 | -0.07055100 | -0.12220500 |
| H | 5.43121700  | 1.16339600  | -3.72076400 | C | 4.02195000  | 0.99452000  | -3.46628100 |
| H | 5.67977400  | -1.64269000 | 4.76101700  | C | 5.38514200  | 0.38941800  | -3.13253600 |
| H | 4.45022700  | -1.60539000 | 6.04450300  | O | 6.06524900  | 1.19741400  | -2.19389100 |
| H | 4.54480900  | -0.28207100 | 4.86341200  | C | 4.03871800  | -0.95184500 | 3.40795900  |
| H | 3.77067300  | -3.19687800 | 4.23216200  | C | 5.45746600  | -0.57515400 | 3.00525600  |
| H | 2.63713600  | -1.83454900 | 4.33141800  | O | 6.10903000  | -1.72862500 | 2.49221000  |
| H | 1.44395600  | -5.12711000 | -4.66318800 | C | 7.43804000  | -1.50436000 | 2.05919300  |
| H | 1.08989300  | -6.17882000 | -3.27416100 | C | 7.57392200  | -0.97285700 | 0.63402700  |
| H | 0.01488700  | -4.81761000 | -3.65509700 | C | 7.37033500  | 0.72677800  | -1.90723900 |
| H | 2.94488400  | -4.56021000 | -2.73993900 | C | 7.79416400  | 1.12662900  | -0.49604900 |
| H | 1.86464900  | -3.20346600 | -3.11625200 | O | 7.19560000  | 0.39455500  | 0.56114600  |
| H | -0.75267900 | -2.44834500 | 6.51133500  | O | -4.91841800 | 1.06865400  | -2.50569100 |
| H | -0.27903400 | -3.99861600 | 5.78227400  | C | -5.11367700 | 0.75574900  | -4.85594000 |
| H | 0.63483900  | -2.52331300 | 5.40753000  | C | -4.52220900 | 1.62188900  | -3.75636700 |
| H | -2.30453000 | -3.03163400 | 4.64854300  | O | -3.60678600 | 3.70156900  | 2.20394900  |
| H | -1.37996700 | -1.56937200 | 4.23390900  | C | -3.71007100 | 4.24089900  | 4.51621600  |
| H | -5.58047100 | -4.55526600 | -2.89498600 | C | -4.17320400 | 3.27642500  | 3.43684000  |
| H | -4.46715000 | -5.15902700 | -4.14341300 | O | -0.90842600 | 4.37733500  | -2.55840900 |
| H | -4.65508200 | -3.41190200 | -3.88686600 | C | 0.55946400  | 5.95720400  | -3.77323900 |
| H | -3.44310900 | -5.39680100 | -1.86312700 | C | -0.78758300 | 5.69928800  | -3.10674000 |
| H | -2.51767300 | -4.25860800 | -2.86231500 | O | 1.56521200  | 3.45804800  | 2.32887500  |
|   |             |             |             | C | 1.85314800  | 3.40789200  | 4.68830500  |
|   |             |             |             | C | 0.88517200  | 3.70359400  | 3.55483000  |
|   |             |             |             | O | 1.67800400  | -3.54778700 | -2.38234000 |
|   |             |             |             | C | 1.99486700  | -3.55742400 | -4.73762100 |
|   |             |             |             | C | 1.01785300  | -3.83767700 | -3.60761500 |
|   |             |             |             | O | -0.93552500 | -4.38995800 | 2.44451100  |
|   |             |             |             | C | -1.17110600 | -4.59165000 | 4.80187900  |
|   |             |             |             | C | -0.22660000 | -4.22934000 | 3.66790400  |
|   |             |             |             | O | -3.43497300 | -3.81064100 | -2.31868900 |
|   |             |             |             | C | -3.43768100 | -4.37150700 | -4.62864400 |
|   |             |             |             | C | -3.95168300 | -3.40072700 | -3.57832400 |
|   |             |             |             | O | -5.04699700 | -1.20459500 | 2.31157000  |
|   |             |             |             | C | -5.42087100 | -0.92143100 | 4.64329800  |
|   |             |             |             | C | -4.74077300 | -1.76878300 | 3.58068600  |
|   |             |             |             | H | -3.34652600 | 3.27493600  | -2.26085100 |
|   |             |             |             | H | -5.10818400 | 1.44301800  | 1.96636100  |
|   |             |             |             | H | 1.54055700  | 3.53046200  | -2.17466100 |
|   |             |             |             | H | -1.00404500 | 4.26748600  | 1.98673000  |
|   |             |             |             | H | -2.74184600 | 5.33211800  | -1.07739900 |
|   |             |             |             | H | -2.75478700 | 5.39056200  | 0.68566800  |
|   |             |             |             | H | 3.62091900  | 3.31026200  | -0.84221100 |
|   |             |             |             | H | 3.55240400  | 3.29185200  | 0.92405600  |
|   |             |             |             | H | -0.89031600 | -4.38748400 | -2.04773700 |
|   |             |             |             | H | 1.61522800  | -3.50625300 | 2.10861000  |
|   |             |             |             | H | -2.63887100 | -5.49279100 | -0.73963400 |
|   |             |             |             | H | -2.63608300 | -5.39115200 | 1.02397700  |
|   |             |             |             | H | 3.09414300  | -1.23271800 | -2.16027700 |
|   |             |             |             | H | 3.04731400  | 1.21703900  | 2.12064200  |
|   |             |             |             | H | 3.63029900  | -3.30382400 | -0.95103800 |
|   |             |             |             | H | 3.67976900  | -3.31476400 | 0.81740400  |
|   |             |             |             | H | -4.97654100 | -1.57523000 | -2.16464100 |
|   |             |             |             | H | -3.43008600 | -3.38649500 | 2.15346700  |
|   |             |             |             | H | -6.50487300 | -0.11013600 | -1.02204800 |
|   |             |             |             | H | -6.55354800 | -0.03745100 | 0.74229800  |

(b) *out*-( $R_p$ )-MUJ1

| Atom | x           | y           | x           |
|------|-------------|-------------|-------------|
| C    | -3.76175600 | 2.87888900  | -1.34168800 |
| C    | -3.43697600 | 3.53447200  | -0.15040300 |
| C    | -3.94172600 | 3.01808300  | 1.05289800  |
| C    | -4.73586400 | 1.86717900  | 1.04211100  |
| C    | -5.05132700 | 1.20327300  | -0.14679600 |
| C    | -4.56106200 | 1.73256600  | -1.35309800 |
| C    | 1.00733400  | 3.72675400  | -1.25016000 |
| C    | 1.64030700  | 3.47325300  | -0.03364000 |
| C    | 0.90406100  | 3.69897200  | 1.14679400  |
| C    | -0.42057700 | 4.13555600  | 1.08378500  |
| C    | -1.05420600 | 4.37503800  | -0.14365000 |
| C    | -0.31290400 | 4.18281700  | -1.31621900 |
| C    | -2.52772300 | 4.75440500  | -0.17426500 |
| C    | 3.06076000  | 2.93080100  | 0.01642500  |
| C    | -0.32306100 | -4.21219600 | -1.14205400 |
| C    | -0.97672000 | -4.41101400 | 0.07787900  |
| C    | -0.26140000 | -4.16945400 | 1.26208900  |
| C    | 1.06303100  | -3.72595200 | 1.20299100  |
| C    | 1.70898500  | -3.50686900 | -0.01693400 |
| C    | 0.99946500  | -3.76477500 | -1.20094700 |
| C    | -2.43970900 | -4.82928700 | 0.10671100  |
| C    | 3.12948500  | -0.69190700 | -1.22014500 |
| C    | 3.14247700  | -1.42897800 | -0.03129200 |
| C    | 3.15797500  | -0.71872700 | 1.17819300  |
| C    | 3.09273500  | 0.67605000  | 1.18148100  |
| C    | 3.10919800  | 1.41224700  | -0.00344800 |
| C    | 3.16898400  | 0.70285000  | -1.21337900 |
| O    | 3.25121900  | 1.45845600  | -2.36542900 |
| O    | 3.22867000  | -1.45555600 | 2.34669000  |

|                      |             |             |             |   |             |             |             |
|----------------------|-------------|-------------|-------------|---|-------------|-------------|-------------|
| H                    | 3.46130200  | 0.25605700  | -4.06162500 | C | -3.81116100 | -1.81103300 | 0.09872600  |
| H                    | 4.15731000  | 1.88602600  | -4.08577400 | C | -3.51366900 | -2.13837500 | 1.43025400  |
| H                    | 5.28027900  | -0.62935700 | -2.73456300 | C | -2.58332200 | -3.13189400 | 1.75418000  |
| H                    | 5.94362600  | 0.31437000  | -4.08304000 | C | -1.89401800 | -3.83315200 | 0.74301800  |
| H                    | 4.06643300  | -1.76584100 | 4.13823300  | C | -0.84635100 | -4.89559900 | 1.07121400  |
| H                    | 3.56617600  | -0.08171700 | 3.88864700  | C | 2.70933200  | -3.79075700 | 0.13917600  |
| H                    | 5.97821400  | -0.20879200 | 3.90816000  | C | 1.46683400  | -4.43073600 | 0.06443200  |
| H                    | 5.45953100  | 0.23184600  | 2.26641700  | C | 0.57076800  | -4.33619400 | 1.14662000  |
| H                    | 7.93131900  | -2.48369400 | 2.09416600  | C | 0.98644600  | -3.64666600 | 2.28599300  |
| H                    | 7.96902700  | -0.83013000 | 2.75014100  | C | 2.20397200  | -2.96395800 | 2.33997900  |
| H                    | 8.62947900  | -1.09084100 | 0.33103900  | C | 3.08852400  | -3.02710900 | 1.25143100  |
| H                    | 6.95727100  | -1.58969200 | -0.03583900 | C | 4.40919000  | -2.25881900 | 1.24601600  |
| H                    | 7.42020500  | -0.36755000 | -2.01495300 | O | 2.58460400  | -2.19395100 | 3.42511100  |
| H                    | 8.09268800  | 1.15298500  | -2.62512000 | O | 1.02617600  | -5.17927200 | -1.00685200 |
| H                    | 8.89322700  | 1.03756400  | -0.43527900 | C | 1.57559500  | -1.49749200 | 4.17172900  |
| H                    | 7.52487800  | 2.17332300  | -0.32505800 | C | 1.03654400  | -0.24108600 | 3.47351200  |
| H                    | -4.84770000 | 1.16078200  | -5.83854100 | C | 0.41148900  | -0.48161800 | 2.09411100  |
| H                    | -4.73248400 | -0.26886900 | -4.79189600 | C | 1.77442200  | -5.28594700 | -2.21982800 |
| H                    | -6.20510700 | 0.72293800  | -4.77700700 | C | 1.22890800  | -4.35840400 | -3.30751200 |
| H                    | -3.42568000 | 1.64933400  | -3.82738500 | C | 1.22135300  | -2.87531400 | -2.92210000 |
| H                    | -4.88773900 | 2.65582800  | -3.84008800 | C | -0.03061400 | 0.78455200  | 1.36380400  |
| H                    | -4.03274900 | 5.26128300  | 4.28613200  | C | 0.66888400  | -1.96488900 | -4.02277600 |
| H                    | -2.61801800 | 4.23597900  | 4.59831600  | C | -0.61079200 | 0.49630500  | -0.03075000 |
| H                    | -4.13052400 | 3.95334000  | 5.48617400  | C | 0.64036100  | -0.46962500 | -3.66095400 |
| H                    | -3.84975900 | 2.25030400  | 3.66683100  | C | 0.37826600  | -0.00220500 | -1.09618300 |
| H                    | -5.27065600 | 3.27124500  | 3.36480000  | C | -0.28636900 | -0.08344000 | -2.48431500 |
| H                    | 1.37688000  | 5.91503800  | -3.04696000 | C | -3.82108400 | 1.15165300  | -1.65878900 |
| H                    | 0.56451000  | 6.95234000  | -4.23470900 | C | -3.21545200 | 2.40010100  | -1.83989900 |
| H                    | 0.75062700  | 5.21273700  | -4.55350300 | C | -2.93587400 | 3.22184000  | -0.73946900 |
| H                    | -0.97677900 | 6.44569200  | -2.32248400 | C | -3.36220200 | 2.78474300  | 0.52374200  |
| H                    | -1.59451100 | 5.77348000  | -3.84399600 | C | -3.99009300 | 1.54714300  | 0.69816500  |
| H                    | 1.37325300  | 3.59963900  | 5.65435400  | C | -4.19994700 | 0.68718100  | -0.39931500 |
| H                    | 2.17101700  | 2.36020800  | 4.66370400  | C | -4.81049300 | -0.69964200 | -0.22117600 |
| H                    | 2.74308000  | 4.04058100  | 4.61069500  | C | -2.11456200 | 4.50138800  | -0.87332000 |
| H                    | -0.00613800 | 3.06353400  | 3.62493500  | C | 0.15645000  | 3.89272200  | -1.83648600 |
| H                    | 0.54924800  | 4.75014800  | 3.59340600  | C | 1.52480200  | 3.61903800  | -1.72647000 |
| H                    | 1.53171500  | -3.78584300 | -5.70387800 | C | 2.16743800  | 3.71631600  | -0.47936900 |
| H                    | 2.29337300  | -2.50366700 | -4.73954200 | C | 1.40523000  | 4.12478900  | 0.62003700  |
| H                    | 2.89489000  | -4.17132600 | -4.62988500 | C | 0.03625000  | 4.39631800  | 0.51057600  |
| H                    | 0.11719400  | -3.21442600 | -3.70794800 | C | -0.61229100 | 4.26799700  | -0.72915000 |
| H                    | 0.69853600  | -4.89031600 | -3.62322200 | C | 3.64646400  | 3.37652700  | -0.31731500 |
| H                    | -1.52428100 | -5.62239800 | 4.69598300  | C | 4.09382400  | 0.93356000  | -0.87217000 |
| H                    | -2.04277900 | -3.92852500 | 4.80927300  | C | 4.29277500  | -0.40739600 | -0.52265500 |
| H                    | -0.65798300 | -4.49703500 | 5.76528100  | C | 4.28560400  | -0.79664000 | 0.82906300  |
| H                    | 0.12508600  | -3.19233600 | 3.76777900  | C | 4.16701000  | 0.21109000  | 1.79124500  |
| H                    | 0.65841500  | -4.88234300 | 3.67635200  | C | 3.98958700  | 1.55451800  | 1.44300800  |
| H                    | -3.76184100 | -5.39214700 | -4.40184900 | C | 3.91456300  | 1.93197400  | 0.09204700  |
| H                    | -2.34329500 | -4.35884400 | -4.66676100 | O | -2.27910000 | -3.48265900 | 3.04977600  |
| H                    | -3.82058300 | -4.09613900 | -5.61752600 | C | -2.60602100 | -3.60054700 | 5.40240000  |
| H                    | -3.62562800 | -2.37444600 | -3.80375800 | C | -3.05617300 | -2.93717300 | 4.11155100  |
| H                    | -5.05114000 | -3.40255300 | -3.55229200 | O | -3.39891600 | -2.23849000 | -2.24280300 |
| H                    | -5.22239400 | -1.33346100 | 5.63890100  | C | -3.91500000 | -4.37974300 | -3.37761500 |
| H                    | -5.04909100 | 0.10833900  | 4.61659300  | C | -4.41423500 | -3.02465000 | -2.88878800 |
| H                    | -6.50387000 | -0.90077500 | 4.48515000  | O | -4.42360000 | 1.08638400  | 1.91873000  |
| H                    | -3.65161700 | -1.78535700 | 3.73425000  | C | -4.94719100 | 1.23175800  | 4.23489200  |
| H                    | -5.09922800 | -2.80760800 | 3.62562000  | C | -4.30519800 | 1.93915700  | 3.05341900  |
|                      |             |             |             | O | -2.79973100 | 2.77467400  | -3.11287100 |
|                      |             |             |             | C | -4.83849400 | 2.69656400  | -4.51398900 |
|                      |             |             |             | C | -3.74381200 | 3.54408200  | -3.87554200 |
| (c) $in-(S_p)$ -MUJ2 |             |             |             | O | -0.74774800 | 4.78711900  | 1.57490800  |
| Atom                 | x           | y           | x           | C | -1.19028400 | 5.50850700  | 3.79635800  |
| C                    | -2.20725200 | -3.51181200 | -0.57866100 | C | -0.12401200 | 5.01156000  | 2.83430300  |
| C                    | -3.15522600 | -2.53471100 | -0.90750100 | O | 2.31034400  | 3.24133700  | -2.79221200 |



|   |             |             |             |                                |             |             |             |
|---|-------------|-------------|-------------|--------------------------------|-------------|-------------|-------------|
| C | 2.86225300  | 2.96461500  | -5.08789300 | H                              | -4.89001600 | 1.86292600  | 5.12845600  |
| C | 1.75439300  | 3.29833700  | -4.10328100 | H                              | -4.43559000 | 0.28718300  | 4.44761500  |
| O | 3.86020100  | 2.56350800  | 2.37726700  | H                              | -4.80752700 | 2.89663600  | 2.85412200  |
| C | 4.33157200  | 3.66079500  | 4.43453800  | H                              | -3.24517100 | 2.15207300  | 3.25391000  |
| C | 4.33638000  | 2.33006800  | 3.70066000  | H                              | -5.48419600 | 3.32689200  | -5.13749800 |
| O | 4.50534500  | -1.40273200 | -1.45242400 | H                              | -4.40073900 | 1.91673800  | -5.14613800 |
| C | 5.41312700  | -2.26858300 | -3.47860100 | H                              | -5.46351800 | 2.21683900  | -3.75439000 |
| C | 4.92249400  | -1.02137000 | -2.76226700 | H                              | -3.14498900 | 4.03625500  | -4.64925800 |
| H | -1.69094500 | -4.02696000 | -1.38247400 | H                              | -4.18369000 | 4.32533500  | -3.23993700 |
| H | -4.01204300 | -1.57924100 | 2.21267000  | H                              | -0.74903000 | 5.70818200  | 4.77904300  |
| H | -0.88546400 | -5.67587300 | 0.30790800  | H                              | -1.64464700 | 6.43262800  | 3.42511700  |
| H | -1.10112500 | -5.35616800 | 2.03031500  | H                              | -1.98142400 | 4.76121000  | 3.91953000  |
| H | 3.39821800  | -3.81698500 | -0.69533100 | H                              | 0.67918200  | 5.75527600  | 2.72744200  |
| H | 0.28976700  | -3.58977200 | 3.11288300  | H                              | 0.32975200  | 4.07994000  | 3.20182000  |
| H | 5.10006100  | -2.76416900 | 0.56398500  | H                              | 3.69066300  | 3.67410300  | -4.99367000 |
| H | 4.84854600  | -2.29699300 | 2.24743200  | H                              | 2.48061900  | 3.00813800  | -6.11387000 |
| H | 2.07844600  | -1.22183500 | 5.10494200  | H                              | 3.24794700  | 1.95592100  | -4.90721700 |
| H | 0.75559300  | -2.17530200 | 4.43914900  | H                              | 1.35306500  | 4.30474200  | -4.29225600 |
| H | 1.85032400  | 0.48689100  | 3.37510000  | H                              | 0.92640500  | 2.58263000  | -4.19382300 |
| H | 0.29609500  | 0.21178600  | 4.15238500  | H                              | 4.68969300  | 3.52774500  | 5.46135500  |
| H | 1.14111400  | -0.99024000 | 1.46257700  | H                              | 4.98029500  | 4.38357400  | 3.92967200  |
| H | -0.44174500 | -1.16596200 | 2.18805500  | H                              | 3.31892800  | 4.07604100  | 4.47429600  |
| H | 2.84006900  | -5.10831300 | -2.04403300 | H                              | 5.34904200  | 1.90425900  | 3.66056300  |
| H | 1.66855400  | -6.33139600 | -2.53195700 | H                              | 3.69063600  | 1.60639500  | 4.21782300  |
| H | 1.82987500  | -4.51792500 | -4.21605000 | H                              | 6.25033000  | -2.72071600 | -2.93725000 |
| H | 0.20604500  | -4.67586900 | -3.55480300 | H                              | 5.74892800  | -2.01385600 | -4.48994900 |
| H | 2.23551100  | -2.55226200 | -2.65125800 | H                              | 4.61328200  | -3.01169800 | -3.56022700 |
| H | 0.61578200  | -2.75537600 | -2.01904100 | H                              | 5.72275400  | -0.27143100 | -2.68979000 |
| H | 0.81942300  | 1.47247800  | 1.27371900  | H                              | 4.08462000  | -0.56652200 | -3.30940500 |
| H | -0.79300500 | 1.31294000  | 1.95734800  |                                |             |             |             |
| H | 1.26380000  | -2.10134900 | -4.93917200 |                                |             |             |             |
| H | -0.35410400 | -2.28431500 | -4.27253300 |                                |             |             |             |
| H | -1.06748500 | 1.41568300  | -0.40344700 |                                |             |             |             |
| H | -1.42570200 | -0.23131500 | 0.06925500  | (d) out-(R <sub>p</sub> )-MUJ2 |             |             |             |
| H | 1.66354800  | -0.12250300 | -3.45071300 | Atom                           | x           | y           | x           |
| H | 0.31737200  | 0.07563200  | -4.55916000 | C                              | -0.31720300 | -4.25225500 | -0.96747200 |
| H | 1.22986400  | 0.68817700  | -1.15135200 | C                              | -1.56942200 | -3.64091600 | -0.85370700 |
| H | 0.79297500  | -0.97628400 | -0.81066300 | C                              | -2.05828400 | -3.19807000 | 0.37808900  |
| H | -1.13487800 | -0.78086100 | -2.45104500 | C                              | -1.26508800 | -3.39416400 | 1.52119000  |
| H | -0.72646900 | 0.89861600  | -2.69844700 | C                              | -0.01867300 | -4.01681600 | 1.40868000  |
| H | -3.94902500 | 0.50720200  | -2.52220900 | C                              | 0.47622200  | -4.44814000 | 0.17381000  |
| H | -3.14294700 | 3.41487300  | 1.37722200  | C                              | 1.86419600  | -5.06310700 | 0.07762600  |
| H | -5.34550800 | -0.95347000 | -1.14067300 | C                              | -3.29794300 | -0.38072800 | -0.97016200 |
| H | -5.55113500 | -0.65903400 | 0.58340500  | C                              | -3.08173600 | 0.99293600  | -1.09820800 |
| H | -2.30103100 | 4.95751200  | -1.84961200 | C                              | -2.95639900 | 1.82781000  | 0.02214400  |
| H | -2.43920500 | 5.21481800  | -0.11089800 | C                              | -3.08766700 | 1.24365400  | 1.29121400  |
| H | -0.35227400 | 3.78093100  | -2.78663400 | C                              | -3.19183300 | -0.14481400 | 1.41330200  |
| H | 1.90520400  | 4.19124200  | 1.57879800  | C                              | -3.28988800 | -0.98457500 | 0.30337700  |
| H | 4.15806400  | 3.57478100  | -1.26314000 | C                              | -3.40280500 | -2.49202000 | 0.46718800  |
| H | 4.07613500  | 4.03997400  | 0.43905400  | O                              | -3.08628500 | 1.99851700  | 2.45668000  |
| H | 4.04792200  | 1.22659100  | -1.91469200 | O                              | -3.52795900 | -1.21133400 | -2.04468400 |
| H | 4.19200400  | -0.08431100 | 2.83303700  | C                              | -4.22142000 | 2.86005400  | 2.67468500  |
| H | -3.18760600 | -3.21487000 | 6.24692000  | C                              | -5.07577600 | 2.42692200  | 3.87070400  |
| H | -2.74727000 | -4.68452500 | 5.34847100  | C                              | -5.85884700 | 1.10268300  | 3.78178700  |
| H | -1.54647900 | -3.40132700 | 5.59393000  | C                              | -7.08612200 | 1.04274200  | 2.84565400  |
| H | -4.12329100 | -3.12511000 | 3.92571200  | C                              | -6.76115600 | 1.05482600  | 1.34084000  |
| H | -2.91253600 | -1.84785700 | 4.16296900  | C                              | -7.78740900 | 0.37066200  | 0.42340300  |
| H | -3.62373200 | -5.02451500 | -2.54294300 | C                              | -7.23358500 | 0.26089900  | -1.00456600 |
| H | -3.05025800 | -4.25345400 | -4.03789200 | C                              | -8.07566700 | -0.53264900 | -2.01294400 |
| H | -4.70763400 | -4.88897200 | -3.93938800 | C                              | -7.28943700 | -0.81244100 | -3.31052100 |
| H | -4.74291300 | -2.41558200 | -3.73766000 | C                              | 4.19455300  | -2.31859900 | -1.22140000 |
| H | -5.26991400 | -3.15133800 | -2.21091600 | C                              | 3.24171000  | -3.33821700 | -1.16147500 |
| H | -6.00029700 | 1.01501300  | 4.02941100  | C                              | 2.95586900  | -4.00483800 | 0.03406300  |
|   |             |             |             | C                              | 3.66620000  | -3.63753200 | 1.18698900  |

|   |             |             |             |   |             |             |             |
|---|-------------|-------------|-------------|---|-------------|-------------|-------------|
| C | 4.62211700  | -2.61747400 | 1.12666200  | H | -8.00084300 | -0.63789800 | 0.80783100  |
| C | 4.89356600  | -1.93650300 | -0.06280900 | H | -7.06322700 | 1.27122500  | -1.40609300 |
| C | 4.42187400  | 2.52192800  | -1.32527600 | H | -6.23881500 | -0.19837100 | -0.93590400 |
| C | 5.06317900  | 1.28007900  | -1.28885000 | H | -8.99600500 | 0.02030500  | -2.24573400 |
| C | 5.25385100  | 0.57970900  | -0.09954800 | H | -8.39540400 | -1.48666300 | -1.56831400 |
| C | 4.80085700  | 1.18051000  | 1.09367300  | H | -6.80792700 | 0.12440200  | -3.62723600 |
| C | 4.14523500  | 2.41308400  | 1.06012000  | H | -7.98238800 | -1.07526200 | -4.12014200 |
| C | 3.93684000  | 3.09759100  | -0.14600600 | H | 2.68461300  | -3.62890500 | -2.04430900 |
| C | 5.90157100  | -0.79671800 | -0.09557200 | H | 5.15557200  | -2.30947100 | 2.01770600  |
| C | -0.39244100 | 3.59712100  | -1.36253000 | H | 5.39093400  | 0.83509100  | -2.22101200 |
| C | 0.97730500  | 3.86938100  | -1.33391600 | H | 3.74826400  | 2.85461800  | 1.96678100  |
| C | 1.64109800  | 4.15223700  | -0.13252600 | H | 6.55933000  | -0.88568200 | 0.77477500  |
| C | 0.89728600  | 4.15343900  | 1.05399800  | H | 6.52484700  | -0.88999300 | -0.99098500 |
| C | -0.47067600 | 3.86718100  | 1.02457100  | H | 1.56990400  | 3.84668800  | -2.24141300 |
| C | -1.14105200 | 3.59696400  | -0.16817700 | H | -1.01568200 | 3.82215500  | 1.96226800  |
| C | -2.63463200 | 3.30348900  | -0.17283500 | H | -3.10105800 | 3.90217000  | 0.61297400  |
| C | 3.14293200  | 4.39483900  | -0.14394800 | H | -3.05976000 | 3.63668400  | -1.12374000 |
| C | -4.01059800 | -0.65583100 | -3.27152200 | H | 3.39662400  | 4.98552800  | -1.02813800 |
| C | -4.92053700 | -1.68767300 | -3.93904000 | H | 3.42684900  | 4.98116900  | 0.73379700  |
| C | -6.23031300 | -1.93332300 | -3.16687300 | H | -4.56284100 | 0.26981400  | -3.06911400 |
| O | -1.79197900 | -2.94809400 | 2.71162300  | H | -3.15896900 | -0.40398600 | -3.91941400 |
| C | -1.82252900 | -2.51300900 | 5.04798700  | H | -5.13782600 | -1.34513400 | -4.96062300 |
| C | -1.02253300 | -3.10306700 | 3.89871400  | H | -4.35954300 | -2.62592500 | -4.03632100 |
| O | 0.21240600  | -4.68244600 | -2.16679900 | H | -6.66842200 | -2.88348000 | -3.49689800 |
| C | 0.19570900  | -5.20241200 | -4.48527200 | H | -5.97242400 | -2.07595700 | -2.11078500 |
| C | -0.59240000 | -4.59559600 | -3.33629000 | H | -2.78591900 | -3.02307800 | 5.14980900  |
| O | 3.35460900  | -4.32223300 | 2.34390200  | H | -2.01053500 | -1.44760500 | 4.88084100  |
| C | 3.68835000  | -5.08532300 | 4.56901000  | H | -1.27047000 | -2.62381000 | 5.98789200  |
| C | 4.15534400  | -4.11169500 | 3.49955500  | H | -0.05741300 | -2.58794800 | 3.78989300  |
| O | 4.51411500  | -1.64360900 | -2.37593500 | H | -0.81499400 | -4.16908500 | 4.07484100  |
| C | 4.19372600  | -0.90406000 | -4.61441300 | H | -0.39157900 | -5.16285100 | -5.40933200 |
| C | 3.72826900  | -1.87402500 | -3.54048100 | H | 1.13062600  | -4.65548500 | -4.64641300 |
| O | 5.04748400  | 0.48738500  | 2.25187700  | H | 0.44204100  | -6.24782800 | -4.27414700 |
| C | 5.12124500  | 0.15312600  | 4.60743200  | H | -0.84300700 | -3.54530800 | -3.54613200 |
| C | 4.66074900  | 1.07535300  | 3.49166700  | H | -1.53678900 | -5.13818100 | -3.18252000 |
| O | 4.20067900  | 3.13784100  | -2.55481400 | H | 4.27712400  | -4.95404800 | 5.48353600  |
| C | 6.44915700  | 3.39003300  | -3.56325900 | H | 2.63329300  | -4.91868500 | 4.80991300  |
| C | 5.21342500  | 4.06517500  | -2.97871100 | H | 3.80299700  | -6.11852000 | 4.22627700  |
| O | 1.52713900  | 4.37627100  | 2.27318600  | H | 4.05114400  | -3.07342400 | 3.84876100  |
| C | 0.26735800  | 6.21559200  | 3.35345400  | H | 5.21550300  | -4.27534200 | 3.25711100  |
| C | 1.56976700  | 5.74176000  | 2.71797800  | H | 5.25745700  | -1.04943400 | -4.83016600 |
| O | -1.09680600 | 3.30677800  | -2.50723700 | H | 4.04220300  | 0.13142700  | -4.29295700 |
| C | -0.27565500 | 4.71736300  | -4.34699900 | H | 3.62901700  | -0.16759200 | -5.53918500 |
| C | -0.43784600 | 3.31227500  | -3.77482700 | H | 2.66491100  | -1.71997400 | -3.30927200 |
| H | -2.18187600 | -3.46616100 | -1.72983800 | H | 3.85014800  | -2.91465000 | -3.87712500 |
| H | 0.60996600  | -4.16191700 | 2.27973400  | H | 4.64329900  | -0.82815500 | 4.52175600  |
| H | 1.92198700  | -5.67922900 | -0.82356700 | H | 4.85790800  | 0.58059100  | 5.58112100  |
| H | 2.03077500  | -5.71519500 | 0.93874900  | H | 6.20652400  | 0.01363700  | 4.57100400  |
| H | -2.98240400 | 1.43998800  | -2.08088800 | H | 3.57072600  | 1.21091300  | 3.51973300  |
| H | -3.21619400 | -0.57586700 | 2.40874000  | H | 5.12411400  | 2.06731500  | 3.59340900  |
| H | -3.85981500 | -2.70994800 | 1.43628700  | H | 7.15175700  | 4.14894800  | -3.92851500 |
| H | -4.06237500 | -2.89026600 | -0.30973900 | H | 6.96432100  | 2.78417400  | -2.81165500 |
| H | -4.81928200 | 2.92292800  | 1.76195500  | H | 6.17411800  | 2.74171100  | -4.40208900 |
| H | -3.82195900 | 3.86150100  | 2.88229300  | H | 5.49442600  | 4.71597800  | -2.13887400 |
| H | -5.77907800 | 3.24984300  | 4.07322400  | H | 4.72547900  | 4.68605800  | -3.73789900 |
| H | -4.40930300 | 2.37560200  | 4.74202600  | H | 0.38987900  | 7.23477000  | 3.73993100  |
| H | -6.20715300 | 0.87402800  | 4.79844900  | H | -0.55038300 | 6.22473500  | 2.62631500  |
| H | -5.16794900 | 0.29340800  | 3.51464400  | H | -0.01517900 | 5.56162700  | 4.18528200  |
| H | -7.78521200 | 1.85426800  | 3.09606100  | H | 1.84800700  | 6.39640400  | 1.88000000  |
| H | -7.61863600 | 0.10900600  | 3.07740500  | H | 2.38158100  | 5.77157600  | 3.45267000  |
| H | -6.61406600 | 2.08587700  | 0.99156500  | H | -1.25113700 | 5.20779400  | -4.42938500 |
| H | -5.80098900 | 0.54814600  | 1.19014700  | H | 0.17179400  | 4.66656700  | -5.34663300 |
| H | -8.74450800 | 0.91264300  | 0.42954000  | H | 0.36677100  | 5.33808800  | -3.71564500 |

|   |             |            |             |   |             |             |             |
|---|-------------|------------|-------------|---|-------------|-------------|-------------|
| H | -1.09035200 | 2.71625500 | -4.42068100 | C | -2.53736300 | -0.90988200 | 3.43789100  |
| H | 0.52370600  | 2.78908500 | -3.70719900 | C | -3.60681200 | -0.59732700 | 2.58133100  |
|   |             |            |             | C | -3.95827100 | -1.46540600 | 1.54261900  |
|   |             |            |             | C | -3.28082200 | -2.67043100 | 1.32717600  |
|   |             |            |             | C | -2.25472500 | -3.01273300 | 2.22322100  |
|   |             |            |             | C | -1.89266600 | -2.13696100 | 3.25206900  |
|   |             |            |             | C | -5.53062100 | 0.80781400  | 2.21740400  |
|   |             |            |             | C | -6.12436800 | 2.06911200  | 2.82220900  |
|   |             |            |             | C | -0.88155200 | -4.79718800 | 3.08186600  |
|   |             |            |             | C | -0.52678900 | -6.22148700 | 2.68856500  |
|   |             |            |             | C | -3.63035800 | -3.55812100 | 0.13867200  |
|   |             |            |             | C | -2.85418700 | -3.20279700 | -1.12412900 |
|   |             |            |             | C | -3.33057700 | -2.23488300 | -2.02447700 |
|   |             |            |             | C | -2.56597000 | -1.87416900 | -3.13998700 |
|   |             |            |             | C | -1.33032400 | -2.46769700 | -3.41064500 |
|   |             |            |             | C | -0.87633300 | -3.47334700 | -2.53828900 |
|   |             |            |             | C | -1.63067300 | -3.82096800 | -1.41175600 |
|   |             |            |             | C | -5.22440300 | -0.94636800 | -2.77572400 |
|   |             |            |             | C | -6.62839800 | -0.63555800 | -2.28434700 |
|   |             |            |             | C | 0.75315300  | -5.19309800 | -2.10859600 |
|   |             |            |             | C | 2.02400900  | -5.72233200 | -2.75257500 |
|   |             |            |             | C | -0.49824900 | -2.01471600 | -4.60511400 |
|   |             |            |             | H | -2.70097400 | 1.92744100  | -5.29589100 |
|   |             |            |             | H | -1.09705600 | 2.68706100  | -5.28461500 |
|   |             |            |             | H | -1.17473700 | 2.53218100  | -2.71061000 |
|   |             |            |             | H | -2.32517400 | 3.64868000  | -3.48634800 |
|   |             |            |             | H | -4.36913700 | 1.93268700  | -1.16555800 |
|   |             |            |             | H | -3.12151800 | 3.19843400  | -1.15868300 |
|   |             |            |             | H | -2.82182600 | 1.36469100  | 0.56179100  |
|   |             |            |             | H | -2.60396100 | 0.20865100  | -0.76977100 |
|   |             |            |             | H | -0.60982100 | 0.62852200  | 1.17671400  |
|   |             |            |             | H | 0.70775300  | 1.43751600  | 0.30775800  |
|   |             |            |             | H | 0.41479800  | -0.18178700 | -1.59809100 |
|   |             |            |             | H | -0.65880200 | -1.16378000 | -0.58331800 |
|   |             |            |             | H | 0.24507600  | -2.48536700 | 0.99804300  |
|   |             |            |             | H | 1.05007800  | -1.26929400 | 2.01225400  |
|   |             |            |             | H | 2.10727400  | -3.57636200 | 2.01184600  |
|   |             |            |             | H | 2.47618400  | -3.34267300 | 0.28505400  |
|   |             |            |             | H | 4.51052300  | -3.87493600 | 2.02541200  |
|   |             |            |             | H | 5.39934600  | -2.35061400 | 2.25058600  |
|   |             |            |             | H | 6.16767300  | -3.70963700 | 0.27448300  |
|   |             |            |             | H | 4.58849600  | -3.44985100 | -0.48631700 |
|   |             |            |             | H | 5.91366100  | -2.20924100 | -2.25830300 |
|   |             |            |             | H | 6.07704500  | -0.50908400 | -1.79018600 |
|   |             |            |             | H | 3.46581200  | -2.10509300 | -1.94387500 |
|   |             |            |             | H | 3.59091200  | -0.58931500 | -1.05645800 |
|   |             |            |             | H | 2.11984600  | -2.17648600 | -3.85867400 |
|   |             |            |             | H | 0.65188600  | 2.52344000  | -4.01505100 |
|   |             |            |             | H | 3.02932200  | 3.20008200  | -3.74872400 |
|   |             |            |             | H | 4.20259800  | 2.01933300  | -3.15612400 |
|   |             |            |             | H | 0.84145500  | 4.76783800  | 0.24192900  |
|   |             |            |             | H | 4.42695300  | 1.55733300  | -0.82064200 |
|   |             |            |             | H | 5.92165800  | 1.74331000  | 0.88423300  |
|   |             |            |             | H | 4.86201800  | 0.32657500  | 1.07585000  |
|   |             |            |             | H | 6.73328300  | 0.28414800  | 2.73313500  |
|   |             |            |             | H | 6.20713500  | 1.85342000  | 3.38410300  |
|   |             |            |             | H | 5.16676900  | 0.42390000  | 3.55913000  |
|   |             |            |             | H | 0.99300500  | 6.19427800  | -1.55126500 |
|   |             |            |             | H | -0.46148400 | 5.17521200  | -1.59139400 |
|   |             |            |             | H | -0.56474500 | 6.95752200  | -3.35282700 |
|   |             |            |             | H | 0.95366700  | 6.35880100  | -4.05803100 |
|   |             |            |             | H | -0.50653900 | 5.35203100  | -4.10731900 |
|   |             |            |             | H | 1.61041200  | 4.84943000  | 2.55798900  |

(e) *in*-(S<sub>p</sub>)-MUJ3

| Atom | x           | y           | x           |
|------|-------------|-------------|-------------|
| O    | -1.23700100 | 0.68660800  | -4.72701400 |
| O    | -3.14163800 | 1.87980000  | -2.76957800 |
| O    | -1.10354300 | 1.64941500  | -0.56701300 |
| O    | 1.34449100  | -1.07128100 | -0.04708200 |
| O    | 3.50202800  | -2.09762800 | 1.61011000  |
| O    | 5.75668600  | -1.74027100 | -0.22691000 |
| O    | 3.95327800  | -0.44933100 | -3.10798000 |
| O    | 1.24808300  | 4.32206000  | -2.40194300 |
| O    | 4.10499600  | 2.11795200  | 1.81452700  |
| O    | -0.76136000 | 4.42136200  | 2.48386700  |
| O    | 0.68884400  | -0.48125700 | 4.64795400  |
| O    | -4.25161300 | 0.60047700  | 2.81158700  |
| O    | -1.62227900 | -4.22145900 | 2.00881100  |
| O    | -4.55529800 | -1.67160800 | -1.73867900 |
| O    | 0.32296000  | -4.06740600 | -2.86227300 |
| C    | -1.76487500 | 2.00872600  | -4.73537500 |
| C    | -2.05378800 | 2.58484800  | -3.35622600 |
| C    | -3.31283300 | 2.13653600  | -1.38073500 |
| C    | -2.46286600 | 1.25604100  | -0.47560100 |
| C    | -0.19467200 | 0.83812600  | 0.18236900  |
| C    | 0.17235100  | -0.44617200 | -0.56873600 |
| C    | 1.15414700  | -1.87422000 | 1.10074000  |
| C    | 2.33414500  | -2.81803300 | 1.24167100  |
| C    | 4.69027400  | -2.87296200 | 1.60005500  |
| C    | 5.31337200  | -3.01492300 | 0.21334100  |
| C    | 5.51576200  | -1.42763300 | -1.59303500 |
| C    | 4.03384800  | -1.16883600 | -1.87162700 |
| C    | 2.66118400  | -0.12967600 | -3.50183600 |
| C    | 1.78018600  | -1.14590200 | -3.88893300 |
| C    | 0.46746300  | -0.88257700 | -4.27661600 |
| C    | 0.06123300  | 0.46777300  | -4.32521000 |
| C    | 0.95558900  | 1.48565000  | -3.98713500 |
| C    | 2.25552600  | 1.21009000  | -3.53564400 |
| C    | 3.16318900  | 2.34725000  | -3.07523400 |
| C    | 2.90123100  | 2.80106300  | -1.64247300 |
| C    | 1.91408300  | 3.75276000  | -1.33529500 |
| C    | 1.64361500  | 4.08174100  | -0.00264500 |
| C    | 2.35393300  | 3.50941700  | 1.05652000  |
| C    | 3.39050500  | 2.60988100  | 0.75034500  |
| C    | 3.64237700  | 2.26520400  | -0.58297900 |
| C    | 5.20852900  | 1.24673500  | 1.55837200  |
| C    | 5.86744200  | 0.93640200  | 2.89130700  |
| C    | 0.43581000  | 5.46600900  | -2.15720900 |
| C    | 0.05768900  | 6.06801900  | -3.50060800 |
| C    | 1.98526700  | 3.82411700  | 2.50042900  |
| C    | 0.93187200  | 2.87802500  | 3.06559800  |
| C    | -0.43692500 | 3.19470500  | 3.01892100  |
| C    | -1.38567700 | 2.28626900  | 3.50204600  |
| C    | -1.01471200 | 1.04614500  | 4.03553600  |
| C    | 0.35573100  | 0.73964300  | 4.10013400  |
| C    | 1.30399000  | 1.64906600  | 3.61876100  |
| C    | -2.12595900 | 4.81967400  | 2.46348300  |
| C    | -2.19053100 | 6.21696000  | 1.86935500  |
| C    | 2.06561700  | -0.76167400 | 4.90703900  |
| C    | 2.12903800  | -2.05986200 | 5.69459200  |
| C    | -2.07208800 | 0.05921500  | 4.51771000  |

|                                     |             |             |             |   |             |             |             |
|-------------------------------------|-------------|-------------|-------------|---|-------------|-------------|-------------|
| H                                   | 2.88495100  | 3.76259700  | 3.11907900  | O | -2.85188700 | 2.46275800  | 0.13870000  |
| H                                   | -2.44312300 | 2.51703200  | 3.45462000  | C | -4.22672100 | 2.85737000  | 0.13059700  |
| H                                   | 2.35897900  | 1.40404100  | 3.63437400  | C | -4.41603100 | 3.94157200  | 1.19115000  |
| H                                   | -2.53541200 | 4.81213500  | 3.48445700  | O | -5.71686100 | 4.50716000  | 1.11037400  |
| H                                   | -2.71606100 | 4.11289000  | 1.86154600  | C | -2.58572100 | -2.44944400 | -3.88965600 |
| H                                   | -3.22693600 | 6.57158900  | 1.84812600  | C | -4.09759500 | -2.56330300 | -3.77482300 |
| H                                   | -1.59584400 | 6.91682900  | 2.46492400  | O | -4.41503000 | -3.73850900 | -3.03976400 |
| H                                   | -1.80296600 | 6.22046200  | 0.84521300  | C | -5.80080000 | -4.00335700 | -2.89378000 |
| H                                   | 2.50817600  | 0.06317000  | 5.48302400  | C | -6.44211800 | -3.30368800 | -1.70189100 |
| H                                   | 2.61656400  | -0.85549100 | 3.96130800  | O | -6.58920700 | -1.91693100 | -1.98073900 |
| H                                   | 3.17077100  | -2.30960600 | 5.92401600  | C | -6.57973200 | -1.06334800 | -0.84958700 |
| H                                   | 1.57652500  | -1.97156600 | 6.63557800  | C | -7.91845200 | -1.01887000 | -0.11009900 |
| H                                   | 1.69808700  | -2.88604600 | 5.11861500  | O | -7.72514600 | -0.16009500 | 0.99881600  |
| H                                   | -1.66506600 | -0.51512300 | 5.35493800  | C | -8.89100400 | 0.10831900  | 1.75778900  |
| H                                   | -2.93533700 | 0.62036000  | 4.88690100  | C | -8.52101300 | 1.01453500  | 2.92782800  |
| H                                   | -4.75091100 | -1.20405900 | 0.85192900  | O | -8.27847200 | 2.36704000  | 2.58887700  |
| H                                   | -1.07219200 | -2.38061500 | 3.91652100  | C | -7.11334100 | 2.60172300  | 1.80754500  |
| H                                   | -5.43131400 | 0.91334800  | 1.12707400  | C | -6.66921700 | 4.04421800  | 2.05656900  |
| H                                   | -6.17376400 | -0.06253700 | 2.40977700  | C | 5.14061000  | 2.07133700  | 1.34321800  |
| H                                   | -7.11279400 | 2.26455900  | 2.39218300  | C | 4.52709500  | 3.09174700  | 0.61087800  |
| H                                   | -6.23056800 | 1.96421400  | 3.90651300  | C | 4.51348900  | 3.08645500  | -0.78705500 |
| H                                   | -5.48427200 | 2.93465500  | 2.62118600  | C | 5.15760300  | 2.03066400  | -1.45240300 |
| H                                   | -1.48500500 | -4.77865900 | 4.00027600  | C | 5.76608500  | 1.00722100  | -0.72007700 |
| H                                   | 0.03096700  | -4.21331600 | 3.27260400  | C | 5.76015600  | 1.00063600  | 0.67791700  |
| H                                   | 0.05100000  | -6.70122400 | 3.48618400  | C | 3.62889200  | -2.22508400 | 3.13964500  |
| H                                   | -1.43219900 | -6.81044500 | 2.51163600  | C | 4.59756600  | -1.24958200 | 2.88683500  |
| H                                   | 0.07441200  | -6.23202300 | 1.77312500  | C | 5.37530900  | -1.27087100 | 1.72536300  |
| H                                   | -3.42569700 | -4.60007400 | 0.40021300  | C | 5.17791900  | -2.32078800 | 0.81352600  |
| H                                   | -4.70100600 | -3.46818000 | -0.06679600 | C | 4.20442100  | -3.29249600 | 1.06307400  |
| H                                   | -2.90542900 | -1.08814100 | -3.80256100 | C | 3.41110400  | -3.25833500 | 2.21367400  |
| H                                   | -1.27121800 | -4.57221200 | -0.71829100 | C | 6.37618000  | -0.15895700 | 1.44716500  |
| H                                   | -5.25812600 | -1.56123400 | -3.68651200 | C | -1.11727700 | -2.64844800 | 2.02074000  |
| H                                   | -4.67614600 | -0.02525900 | -3.00627500 | C | 0.09075900  | -3.09340200 | 2.56482400  |
| H                                   | -7.18162200 | -0.08346400 | -3.05203600 | C | 0.98528800  | -3.87300400 | 1.82515400  |
| H                                   | -7.17464900 | -1.55642000 | -2.05551900 | C | 0.63431900  | -4.22082300 | 0.51040600  |
| H                                   | -6.59702700 | -0.02097800 | -1.37775500 | C | -0.57701300 | -3.78113500 | -0.03178300 |
| H                                   | -0.03204600 | -5.96322500 | -2.10251300 | C | -1.46235100 | -2.98711300 | 0.70246900  |
| H                                   | 0.94019500  | -4.90081100 | -1.06431600 | C | -2.74904000 | -2.48081600 | 0.06850200  |
| H                                   | 2.38997400  | -6.59783300 | -2.20490400 | C | 2.31787300  | -4.29480200 | 2.42739700  |
| H                                   | 1.83722800  | -6.01463700 | -3.79064000 | O | 0.25122200  | 2.09481100  | -4.37374100 |
| H                                   | 2.80802100  | -4.95763300 | -2.74830700 | C | 0.51699800  | 1.07868500  | -6.50545900 |
| H                                   | -1.17522100 | -1.69046800 | -5.40088400 | C | 1.22659000  | 1.78379800  | -5.36138500 |
| H                                   | 0.07552100  | -2.86555300 | -4.98324800 | O | 1.70679300  | 4.89311100  | 0.19571000  |
|                                     |             |             |             | C | 1.38928200  | 6.12886900  | 2.20258400  |
|                                     |             |             |             | C | 0.70327800  | 5.33441600  | 1.10374200  |
|                                     |             |             |             | O | 5.14501000  | 2.07476900  | -2.83092100 |
|                                     |             |             |             | C | 5.80741200  | 1.44782600  | -5.02677700 |
|                                     |             |             |             | C | 5.89680500  | 1.10411500  | -3.54899300 |
|                                     |             |             |             | O | 5.17940600  | 2.04338600  | 2.72146800  |
|                                     |             |             |             | C | 4.91386200  | 2.91668300  | 4.91730900  |
|                                     |             |             |             | C | 4.66428400  | 3.15885000  | 3.43785000  |
|                                     |             |             |             | O | 5.98362000  | -2.32165100 | -0.30547900 |
|                                     |             |             |             | C | 6.95490800  | -3.22839300 | -2.27748600 |
|                                     |             |             |             | C | 5.90208800  | -3.42493300 | -1.19919600 |
|                                     |             |             |             | O | 2.84375000  | -2.24072200 | 4.27375600  |
|                                     |             |             |             | C | 2.19870600  | -1.60628600 | 6.47268700  |
|                                     |             |             |             | C | 3.11780700  | -1.29769600 | 5.30221900  |
|                                     |             |             |             | O | 1.53690500  | -4.99960100 | -0.18154500 |
|                                     |             |             |             | C | 2.31713500  | -6.32569700 | -1.99352200 |
|                                     |             |             |             | C | 1.18961600  | -5.43995900 | -1.48979800 |
|                                     |             |             |             | O | -2.02601700 | -1.87574400 | 2.71149700  |
|                                     |             |             |             | C | -2.88639200 | -0.67595000 | 4.57356200  |
|                                     |             |             |             | C | -1.73122000 | -1.51689800 | 4.05560200  |
| <b>(f) out-(R<sub>p</sub>)-MUJ3</b> |             |             |             |   |             |             |             |
| Atom                                | x           | y           | x           |   |             |             |             |
| C                                   | 1.31627200  | 4.19303800  | -0.92497300 |   |             |             |             |
| C                                   | -0.00881100 | 3.83153500  | -1.18388900 |   |             |             |             |
| C                                   | -0.36311000 | 3.12313200  | -2.33560800 |   |             |             |             |
| C                                   | 0.64809700  | 2.78439600  | -3.24788100 |   |             |             |             |
| C                                   | 1.97352800  | 3.14645100  | -2.98911100 |   |             |             |             |
| C                                   | 2.33149500  | 3.84390300  | -1.83169300 |   |             |             |             |
| C                                   | 3.78936100  | 4.18209900  | -1.55532400 |   |             |             |             |
| C                                   | -2.60040600 | 1.29809300  | -0.58327200 |   |             |             |             |
| C                                   | -2.79546200 | 0.06624700  | 0.04180700  |   |             |             |             |
| C                                   | -2.57513900 | -1.14056500 | -0.62861800 |   |             |             |             |
| C                                   | -2.15603600 | -1.06801300 | -1.96835900 |   |             |             |             |
| C                                   | -1.92071300 | 0.16506100  | -2.57977300 |   |             |             |             |
| C                                   | -2.13405400 | 1.37178300  | -1.90357000 |   |             |             |             |
| C                                   | -1.80761700 | 2.70312600  | -2.56237900 |   |             |             |             |
| O                                   | -1.92362400 | -2.25805800 | -2.63853000 |   |             |             |             |

|   |             |             |             |
|---|-------------|-------------|-------------|
| H | -0.79563700 | 4.06818900  | -0.47755100 |
| H | 2.76655300  | 2.86976200  | -3.67274200 |
| H | 4.30065600  | 4.35160800  | -2.50725600 |
| H | 3.83908200  | 5.11143700  | -0.98084100 |
| H | -3.11230000 | 0.05005500  | 1.08022600  |
| H | -1.53555700 | 0.19813700  | -3.59413800 |
| H | -1.99892400 | 2.63013400  | -3.63636100 |
| H | -2.46540500 | 3.47946000  | -2.16110200 |
| H | -4.86546600 | 1.98961700  | 0.33627000  |
| H | -4.51139300 | 3.25849200  | -0.85296100 |
| H | -4.21221700 | 3.53598000  | 2.19280000  |
| H | -3.69636800 | 4.74800400  | 1.00546300  |
| H | -2.34515400 | -1.63928100 | -4.59198100 |
| H | -2.17333100 | -3.38174000 | -4.28605600 |
| H | -4.51777500 | -1.67208700 | -3.29663200 |
| H | -4.51783500 | -2.62725400 | -4.79388500 |
| H | -6.34911300 | -3.74339900 | -3.81267400 |
| H | -5.88777600 | -5.08625300 | -2.74214700 |
| H | -5.80741800 | -3.45395100 | -0.81639200 |
| H | -7.42183000 | -3.76898700 | -1.50063500 |
| H | -5.78732700 | -1.35303500 | -0.14505300 |
| H | -6.34488900 | -0.06119300 | -1.22090400 |
| H | -8.22080400 | -2.02452000 | 0.22796800  |
| H | -8.70806000 | -0.64010900 | -0.77843200 |
| H | -9.66105600 | 0.59312400  | 1.13612700  |
| H | -9.31679100 | -0.83105300 | 2.15255000  |
| H | -9.35931900 | 1.03610400  | 3.63295000  |
| H | -7.64837800 | 0.57967400  | 3.44214800  |
| H | -6.32188800 | 1.89194300  | 2.08553300  |
| H | -7.31947600 | 2.46380800  | 0.73824300  |
| H | -7.53665500 | 4.70328800  | 1.95217300  |
| H | -6.28661100 | 4.14957500  | 3.08372700  |
| H | 4.01922900  | 3.90552900  | 1.11345300  |
| H | 6.23730700  | 0.17228200  | -1.22364900 |
| H | 4.75120100  | -0.42861400 | 3.57645900  |
| H | 4.01995300  | -4.08824800 | 0.35161100  |
| H | 6.77240500  | 0.20957400  | 2.39766200  |
| H | 7.21354500  | -0.56324100 | 0.87148800  |
| H | 0.37909400  | -2.82078300 | 3.57239900  |
| H | -0.84745100 | -4.02061900 | -1.05267700 |
| H | -3.09886400 | -3.21296900 | -0.66476700 |
| H | -3.51454200 | -2.38148400 | 0.84411600  |
| H | 2.18647800  | -4.46248400 | 3.50021200  |
| H | 2.63115200  | -5.24129700 | 1.97833600  |
| H | 1.23150600  | 0.83116800  | -7.29819900 |
| H | 0.05114200  | 0.15031900  | -6.15876900 |
| H | -0.26317600 | 1.71954100  | -6.92849800 |
| H | 1.71127400  | 2.70618200  | -5.71358100 |
| H | 2.00716200  | 1.13969800  | -4.93064600 |
| H | 0.64759700  | 6.50227400  | 2.91721500  |
| H | 2.10596600  | 5.50329100  | 2.74518100  |
| H | 1.92803100  | 6.98397400  | 1.78199400  |
| H | -0.03122100 | 5.95941000  | 0.57493300  |
| H | 0.16647900  | 4.47098000  | 1.52204500  |
| H | 6.38347200  | 0.72726400  | -5.61777200 |
| H | 4.76764400  | 1.42149500  | -5.36956800 |
| H | 6.20637100  | 2.44971000  | -5.21462900 |
| H | 6.94304600  | 1.11421400  | -3.21025900 |
| H | 5.49504600  | 0.09757200  | -3.35943300 |
| H | 4.54258100  | 3.76258800  | 5.50630600  |
| H | 4.40009600  | 2.01022200  | 5.25456100  |
| H | 5.98423800  | 2.79909500  | 5.11398000  |
| H | 5.16328900  | 4.08084600  | 3.10552100  |

|   |             |             |             |
|---|-------------|-------------|-------------|
| H | 3.58826200  | 3.27184500  | 3.23864800  |
| H | 6.93329800  | -4.06599700 | -2.98336100 |
| H | 6.77236800  | -2.30342900 | -2.83473200 |
| H | 7.95457800  | -3.17203500 | -1.83506500 |
| H | 6.07613800  | -4.36345900 | -0.65288400 |
| H | 4.89677700  | -3.47920600 | -1.64264600 |
| H | 2.38586400  | -0.90654300 | 7.29469500  |
| H | 1.14822500  | -1.51661200 | 6.17638400  |
| H | 2.36737300  | -2.62448300 | 6.83736900  |
| H | 4.17227700  | -1.37023900 | 5.60611200  |
| H | 2.94736100  | -0.27524500 | 4.93343700  |
| H | 2.08292800  | -6.70221900 | -2.99537000 |
| H | 3.25694700  | -5.76584200 | -2.04687100 |
| H | 2.46368500  | -7.18077600 | -1.32592500 |
| H | 0.24224000  | -5.99761000 | -1.45826000 |
| H | 1.04467900  | -4.57571900 | -2.15376000 |
| H | -2.70804600 | -0.38966300 | 5.61600200  |
| H | -2.99720500 | 0.23652200  | 3.97863300  |
| H | -3.82492300 | -1.23746800 | 4.52352300  |
| H | -1.60417400 | -2.42217300 | 4.66776800  |
| H | -0.78877600 | -0.95156600 | 4.09659700  |

## References

- s1. Aytou, A. J. L., Fukuhara, G., Kumarasamy, E., Inoue, Y. & Sivaguru, J. Enantiospecific photochemical transformations under elevated pressure. *Chem. Eur. J.* **19**, 4327-4334 (2013).
- s2. Hembury, G. A., Borovkov, V. V. & Inoue, Y. Chirality-sensing supramolecular systems. *Chem. Rev.* **108**, 1-73 (2008).
- S3. Yao, J. *et al.* Temperature-driven planar chirality switching of a pillar[5]arene-based molecular universal joint. *Angew. Chem. Int. Ed.* **56**, 6869-6873 (2017).
- s4. Zhang, Z., Xia, B., Han, C., Yu, Y. & Huang, F. Syntheses of copillar[5]arenes by co-oligomerization of different monomers. *Org. Lett.* **12**, 3285-3287 (2010).
- s5. Cao, D. *et al.* A facile and efficient preparation of pillararenes and a pillarquinone. *Angew. Chem. Int. Ed.* **48**, 9721-9723 (2009).
- s6. C. Reichardt, "Solvents and Solvent Effects in Organic Chemistry" VCH, Weinheim (1990).
- s7. Rekharsky, M. V. & Inoue, Y. Complexation thermodynamics of cyclodextrins. *Chem. Rev.* **98**, 1875-1918 (1998).
